# Supplementary material for: Transcriptome-Based Evaluation of Optimal Reference Genes for Quantitative Real-Time PCR in Yak Stomach throughout the Growth Cycle
Source: Animals (Basel). 2023 Mar 3;13(5):925. doi: 10.3390/ani13050925 (PMC10000025; doi:10.3390/ani13050925)
Supplement: Supplementary file 1 [file animals-13-00925-s001.zip]

Archive with 6 entries (6 files):
- Table S2.xlsx
- Table S3.xlsx
- Figure S1.pdf
- Figure S2.pdf
- Figure S3.pdf
- Table S1.xlsx
