# Supplementary material for: Transcriptome-Based Evaluation of Optimal Reference Genes for Quantitative Real-Time PCR in Yak Stomach throughout the Growth Cycle
Source: Animals (Basel). 2023 Mar 3;13(5):925. doi: 10.3390/ani13050925 (PMC10000025; doi:10.3390/ani13050925)
Supplement: Supplementary file 1 [file animals-13-00925-s001.zip › Table S1.xlsx]

## Sheet: Sheet1
Sample ID	Sample Name	*CONC(ng/ul)	A260/A280	A260/A230	Sample ID	Sample Name	CONC(ng/ul)	A260/A280	A260/A230
1	0d-1-Rum	281.8	2.14	1.7	31	0d-1-Oma	678.7	2.1	1.87
2	0d-2-Rum	404.5	2.12	2.08	32	0d-2-Oma	1334.3	2.06	2.18
3	0d-3-Rum	247.5	2.14	2.06	33	0d-3-Oma	943.8	2.1	2.16
4	20d-1-Rum	479	2.11	2.08	34	20d-1-Oma	1249.3	2.09	2.17
5	20d-2-Rum	375.6	2.13	2.03	35	20d-2-Oma	1097.5	2.11	2.17
6	20d-3-Rum	376.2	2.12	2.04	36	20d-3-Oma	1160.7	2.12	2.13
7	60d-1-Rum	260.9	2.09	1.78	37	60d-1-Oma	822.3	2.13	1.88
8	60d-2-Rum	298.5	2.14	2.06	38	60d-2-Oma	512.8	2.12	1.93
9	60d-3-Rum	237.9	2.14	1.87	39	60d-3-Oma	566.1	2.12	2.07
10	15m-1-Rum	235	2.14	1.95	40	15m-1-Oma	719	2.12	2.13
11	15m-2-Rum	205.9	2.14	2.07	41	15m-2-Oma	645.2	2.13	1.9
12	15m-3-Rum	368.7	2.12	1.77	42	15m-3-Oma	322.5	2.12	1.79
13	adult-1-Rum	121.6	2.18	2.07	43	adult-1-Oma	247.4	2.03	1.78
14	adult-2-Rum	115.3	2.18	1.71	44	adult-2-Oma	325.7	2.1	1.55
15	adult-3-Rum	242.3	2.15	2.07	45	adult-3-Oma	396.9	2.1	2.11
16	0d-1-Ret	632.8	2.12	2.13	46	0d-1-Abo	1491.7	2.08	2.11
17	0d-2-Ret	776.2	2.1	1.96	47	0d-2-Abo	1334.3	2.06	2.18
18	0d-3-Ret	687.4	2.1	2.15	48	0d-3-Abo	795.3	2.12	2.18
19	20d-1-Ret	638.4	2.15	2.18	49	20d-1-Abo	907.7	2.11	2.17
20	20d-2-Ret	715.7	2.11	2.2	50	20d-2-Abo	457.9	2.12	1.95
21	20d-3-Ret	318.3	2.13	2.01	51	20d-3-Abo	605.5	2.16	2.12
22	60d-1-Ret	502.2	2.09	2.02	52	60d-1-Abo	1021.2	2.11	2.07
23	60d-2-Ret	656.7	2.11	2	53	60d-2-Abo	662.6	2.13	2.06
24	60d-3-Ret	682.3	2.12	1.78	54	60d-3-Abo	1128.7	2.05	2.16
25	15m-1-Ret	335.2	2.11	2.06	55	15m-1-Abo	1333.3	2.08	2.18
26	15m-2-Ret	586.1	2.15	2.13	56	15m-2-Abo	556.6	2.13	2.14
27	15m-3-Ret	722	2.13	2.17	57	15m-3-Abo	468.2	2.1	1.72
28	adult-1-Ret	404.9	2.09	2.03	58	adult-1-Abo	551.5	2.14	1.77
29	adult-2-Ret	330.7	2.09	1.91	59	adult-2-Abo	386.8	2.12	2.09
30	adult-3-Ret	447.9	2.08	2.04	60	adult-3-Abo	647.7	2.17	2.07
* CONC = Concentration
