# Supplementary material for: Transcriptome-Based Evaluation of Optimal Reference Genes for Quantitative Real-Time PCR in Yak Stomach throughout the Growth Cycle
Source: Animals (Basel). 2023 Mar 3;13(5):925. doi: 10.3390/ani13050925 (PMC10000025; doi:10.3390/ani13050925)
Supplement: Supplementary file 1 [file animals-13-00925-s001.zip › Table S2.xlsx]

## Sheet: Sheet1
	Adult_1	Adult_1_Abo	Adult_1_Oma	Adult_1_Ret	Adult_2	Adult_2_Abo	Adult_2_Oma	Adult_2_Ret	Adult_3	Adult_3_Abo	Adult_3_Oma	Adult_3_Ret	S0d_1	S0d_1_Abo	S0d_1_Oma	S0d_1_Ret	S0d_2	S0d_2_Abo	S0d_2_Oma	S0d_2_Ret	S0d_3	S0d_3_Abo	S0d_3_Oma	S0d_3_Ret	S15m_1	S15m_1_Abo	S15m_1_Oma	S15m_1_Ret	S15m_2	S15m_2_Abo	S15m_2_Oma	S15m_2_Ret	S15m_3	S15m_3_Abo	S15m_3_Oma	S15m_3_Ret	S20d_1	S20d_1_Abo	S20d_1_Oma	S20d_1_Ret	S20d_2	S20d_2_Abo	S20d_2_Oma	S20d_2_Ret	S20d_3	S20d_3_Abo	S20d_3_Oma	S20d_3_Ret	S60d_1
HNRNPL	131.637	113.483	141.333	140.211	129.397	141.503	113.929	136.232	145.152	126.199	149.28	141.045	154.224	203.604	146.812	144.725	144.96	161.732	154.24	139.586	148.737	199.034	122.662	133.459	132.981	142.648	135.558	134.621	130.276	122.48	136.534	134.585	140.608	111.493	138.14	152.109	147.066	146.88	154.153	146.361	167.521	164.714	167.422	162.917	137.544	142.203	144.25	141.097	123.834
HNRNPK	192.015	117.312	182.512	169.36	173.618	143.369	157.342	167.232	196.433	136.026	163.273	170.576	219.55	220.517	171.481	172.235	198.017	209.421	178.71	167.1	193.541	179.179	177.806	181.508	188.416	143.425	156.515	170.786	178.865	120.676	149.106	166.371	185.979	108.18	153.597	153.155	182.951	147.769	174.833	147.911	182.521	156.534	189.974	172.889	181.398	171.016	172.794	172.418	171.635
SERF2	162.268	114.464	148.577	155.483	160.171	142.27	149.287	160.239	135.968	124.161	161.469	155.834	182.016	181.048	132.884	139.005	131.553	152.622	139.927	126.458	189.017	217.411	126.101	130.134	151.683	128.707	168.818	172.669	142.051	131.059	142.861	154.397	141.104	104.743	137.945	146.778	146.613	148.099	136.93	144.895	152.443	145.098	144.833	143.961	138.432	126.037	134.06	125.723	145.223
PCBP2	207.911	173.521	230.677	197.544	198.86	242.474	218.261	231.776	212.64	235.302	239.2	209.95	223.696	304.356	234.002	224.391	252.639	307.578	275.024	237.686	219.005	254.395	226.856	182.945	242.351	295.978	266.071	264.623	222.838	270.64	233.138	236.302	203.651	236.607	229.958	218.255	223.076	248.819	236.259	212.972	189.769	323.681	232.806	213.249	249.381	298.869	279.52	257.645	231.272
OAZ1	220.168	179.473	243.728	229.927	194.08	220.928	209.24	282.381	225.05	214.748	264.068	277.704	278.987	304.597	247.755	292.574	239.072	243.98	270.337	268.523	270.215	348.929	241.883	253.079	242.356	231.05	229.419	291.42	228.078	211.64	225.887	260.181	234.034	188.79	210.198	315.488	210.733	231.268	248.709	247.802	242.114	228.481	262.636	255.463	224.666	248.188	254.133	280.541	202.711
GNB1	110.229	103.305	127.384	116.186	118.594	138.157	144.726	125.351	113.44	135.575	137.87	121.97	130.016	183.81	124.795	123.386	117.322	157.97	123.244	125.125	121.407	170.264	120.893	127.478	109.005	134.327	125.285	117.926	107.077	125.105	128.292	113.889	111.674	107.365	135.675	116.667	115.281	137.254	108.055	115.758	119.535	158.746	116.507	122.365	117.845	148.612	127.354	117.487	119.364
PCBP1	121.657	85.3494	146.735	120.754	127.079	113.228	143.819	124.945	147.189	118.073	152.159	141.611	133.606	155.154	142.872	138.782	103.9	118.361	104.443	115.835	108.842	155.166	107.02	127.656	149.143	109.461	143.861	153.237	142.428	96.8279	149.086	135.036	127.668	82.1299	130.127	154.124	111.074	105.177	118.513	117.827	130.678	123.25	142.627	133.806	107.872	121.864	117.339	112.988	124.374
CNBP	162.575	104.753	150.975	152.157	160.542	131.671	139.416	173.553	140.995	113.134	158.581	145.543	170.996	135.614	123.844	135.081	168.259	142.857	168.093	141.14	155.093	132.495	127.272	124.915	142.019	106.431	137.103	146.473	139.435	102.885	132.805	133.024	122.089	84.4661	118.46	116.15	122.845	106.316	132.542	117.872	122.286	120.309	146.389	118.844	135.724	134.282	135.302	131.584	130.276
CTNNA1	154.03	99.2524	123.024	118.915	124.562	134.418	116.056	121.001	162.687	150.12	152.962	142.722	143.111	173.896	139.207	109.969	135.178	146.587	121.54	102.221	139.572	139.483	144.591	109.868	167.875	138.157	150.44	130.668	159.439	123.454	161.689	160.058	173.723	103.724	146.914	129.4	144.638	124.189	121.915	111.458	129.692	142.131	123.353	111.906	146.896	144.427	121.788	114.041	153.805
LOC102266153	192.934	161.345	190.418	193.769	202.773	178.193	231.458	214.387	171.552	150.582	221.071	199.064	263.88	247.732	192.294	246.578	235.248	256.625	227.95	228.495	277.826	277.871	207.887	279.195	180.809	189.682	217.178	206.115	187.153	178.619	198.826	186.597	171.752	168.136	201.093	160.465	223.087	212.663	212.464	236.835	228.853	253.76	206.649	236.628	203.213	199.204	211.744	211.753	208.276
EIF4H	164.294	96.9083	170.342	153.512	161.354	125.308	160.998	163.526	170.994	114.969	174.504	162.84	174.606	156.042	161.673	162.276	174.847	156.615	181.688	169.669	173.261	168.031	161.41	163.889	178.714	117.502	195.155	199.873	167.931	106.477	183.719	173.823	160.02	91.5537	172.46	166.118	159.585	127.325	183.904	158.353	170.209	155.714	187.377	172.347	174.883	143.125	193.933	166.669	178.077
CAPZB	134.72	88.3177	138.41	130.521	116.12	128.44	135.43	136.583	130.786	115	143.48	129.058	108.086	138.969	104.871	104.677	112.586	150.742	132.484	111.195	124.927	160.378	113.246	108.849	107.813	87.4619	116.851	115.694	116.918	89.9085	125.344	130.127	118.973	73.5307	117.742	126.97	102.134	98.9239	129.064	106.132	116.58	117.499	132.379	119.156	129.01	107.786	145.879	123.028	116.081
UBL5	121.535	108.821	118.87	113.583	111.318	125.193	127.083	139.766	125.4	121.858	126.404	137.815	159.642	165.931	137.729	142.04	126.547	152.571	140.568	123.85	170.327	191.488	139.714	124.283	113.064	131.608	110.562	123.246	112.058	124.817	117.726	110.919	111.939	99.8041	110.755	129.415	117.519	113.943	134.048	116.041	131.865	123.783	146.2	127.44	110.795	130.187	123.238	108.872	117.838
RHOA	192.707	116.345	198.793	186.863	182.918	165.194	220.658	182.866	223.88	162.556	222.749	193.731	191.319	195.604	168.338	162.087	140.292	206.1	179.692	147.132	191.045	206.035	177.318	193.195	197.831	145.109	198.508	192.948	191.925	145.916	180.299	178.031	206.123	120.595	171.94	188.158	165.259	141.23	168.71	137.75	206.335	168.81	175.812	164.101	173.352	171.413	160.991	140.911	171.394
RAC1	186.667	148.141	190.963	175.518	179.063	212.26	179.17	194.282	189.099	184.583	207.779	190.19	156.501	242.492	153.94	143.694	156.065	227.55	182.137	143.333	176.979	230.138	171.05	147.711	173.793	177.628	175.865	169.589	183.289	197.764	176.603	182.699	191.891	156.243	180.383	187.854	154.143	184.133	159.976	149.28	156.941	202.404	162.979	155.537	158.829	233.836	164.588	153.518	166.321
GABARAP	234.543	276.947	249.397	233.165	243.104	310.13	267.165	259.209	261.506	282.182	266.368	280.369	288.567	359.386	302.325	234.388	356.488	394.448	363.834	301.77	353.737	409.172	294.076	240.727	261.053	332.603	243.5	297.386	290.307	321.596	238.572	264	282.118	284.349	276.921	296.844	234.06	287.713	281.448	224.561	252.885	314.402	239.904	237.264	272.348	324.618	290.155	274.296	289.88
PPP1R11	24.5231	22.4321	28.0301	26.2508	24.5928	27.4839	25.6688	25.1531	25.3518	25.5628	24.1062	24.5249	22.338	27.4232	25.0761	21.4987	13.0402	18.9383	21.4522	14.5557	23.693	24.2125	23.6174	16.9513	25.3602	29.1036	24.8688	31.6647	24.9436	23.4296	25.8736	24.1639	25.4054	24.3615	24.4472	27.6694	25.6798	25.826	24.804	23.4359	23.4878	29.7172	24.9877	22.18	27.5373	29.2683	21.9272	21.0864	27.5039
DCTN2	135.682	88.3562	135.17	122.673	162.317	133.243	133.585	151.377	117.36	87.9984	117.183	121.048	105.562	116.777	101.346	95.7534	146.039	146.544	166.288	140.074	133.711	123.438	121.307	104.854	125.161	118.169	120.243	155.353	124.444	106.919	103.465	116.481	106.397	95.7702	109.066	102.518	109.51	125.522	111.119	116.299	86.4606	148.257	95.8543	95.2566	124.305	119.537	119.89	129.276	144.679
CLTA	100.731	74.2433	94.5211	97.1987	105.061	100.479	101.77	118.276	131.726	83.496	111.868	121.908	120.798	127.254	118.194	112.15	166.085	154.495	162.574	125.038	132.657	151.79	108.248	85.6393	134.636	114.074	120.504	146.413	130.359	108.518	93.7404	111.667	120.733	93.6745	101.057	123.635	121.08	104.989	135.876	108.175	114.183	134.564	125.935	109.57	142.377	128.013	128.84	127.056	125.116
ARF1	212.902	178.311	181.105	221.47	156.626	211.744	175.104	192.855	258.82	217.46	229.544	237.833	256.162	319.126	263.826	260.723	214.809	253.125	243.931	255.995	237.122	336.95	252.117	224.786	214.233	217.137	189.435	207.159	203.182	203.528	216.14	226.618	236.315	160.453	198.41	265.652	219.149	211.225	255.067	209.993	221.517	215.44	254.531	210.335	214.794	233.825	235.846	214.013	190.958
NDUFB10	126.822	117.454	107.776	133.874	162.749	132.203	114.859	157.794	139.844	141.057	118.064	125.394	137.565	134.185	103.028	113.816	128.051	110.041	136.429	110.541	180.513	148.713	115.933	109.58	123.539	144.607	133.499	177.995	129.248	125.737	121.032	129.653	113.379	102.855	103.747	124.437	103.561	94.3207	100.82	112.112	95.0222	125.579	112.892	104.003	150.371	128.784	122.741	141.076	135.487
SRSF1	123.537	78.4608	121.822	109.912	105.518	97.5566	82.464	101.428	116.482	81.9279	84.2675	89.1992	145.414	127.671	121.737	131.817	118.987	91.5304	96.3442	99.6472	112.93	101.651	111.765	108.43	115.827	75.9706	102.116	96.2687	103.081	60.7141	103.241	96.6178	110.658	68.02	92.2879	97.1192	115.737	76.3744	105.094	98.1723	112.257	87.5265	111.285	99.3918	96.2741	83.9927	79.5112	98.8947	83.0294
YWHAE	203.697	132.105	186.619	179.544	143.998	143.608	150.403	148.393	207.625	163.824	174.75	167.979	238.658	240.68	202.996	194.668	178.759	181.704	196.273	174.321	224.772	224.933	199.571	158.514	187.783	140.978	186.016	155.064	154.496	135.897	180.78	165.463	197.046	115.262	167.76	181.608	186.119	127.715	212.303	154.819	202.168	138.647	217.246	170.661	191.431	148.2	193.212	163.473	178.254
ITM2B	662.139	470.03	708.228	798.926	659.896	731.348	667.461	903.985	699.217	700.103	648.855	769.802	841.542	830.493	705.505	582.2	863.061	652.24	1044.47	792.429	787.422	591.447	694.283	474.145	620.978	873.857	703.372	684.236	674.315	808.148	738.73	938.556	730.311	620.733	775.69	754.719	751.14	695.617	680.094	564.783	725.355	777.723	598.518	585.117	995.478	906.5	824.189	898.942	715.399
LOC102271874	96.118	65.0404	91.2796	74.5793	100.002	85.5901	98.854	89.3607	104.378	83.5249	92.9085	82.6831	102.335	119.699	92.126	81.7402	139.077	134.764	141.436	105.569	98.1836	101.025	102.349	74.7259	112.267	109.582	104.995	98.4984	107.642	101.701	95.1253	88.5028	107.1	91.3249	94.0408	73.9145	112.755	97.5197	89.1842	78.346	84.3757	116.408	86.6484	79.6982	124.278	111.295	101.201	107.644	117.025
SUMO2	192.373	110.052	161.483	168.388	180.023	125.928	138.419	176.605	175.703	131.906	175.557	163.53	214.915	155.985	181.554	152.678	175.925	149.766	200.717	143.148	222.123	150.465	175.323	136.901	182.533	120.723	176.842	191.406	170.681	114.581	145.835	152.872	175.215	99.5329	146.038	141.336	190.798	128.064	196.065	149.575	190.387	153.04	176.741	151.969	187.286	133.094	174.792	164.993	177.518
CTNNB1	119.076	66.5851	115.773	118.355	109.473	106.589	113.564	121.925	127.469	92.2743	133.673	123.699	149.703	190.006	163.977	135.574	113.941	146.159	118.36	108.148	110.485	143.381	147.864	116.159	129.778	107.317	138.339	109.295	111.661	84.2196	126.811	127.641	132.397	81.8151	129.803	113.178	111.335	124.363	127.344	107.857	101.116	134.811	136.534	125.743	108.406	146.888	133.404	124.128	110.115
RALY	111.104	79.4327	126.113	115.361	106.556	106.847	114.556	120.98	112.963	97.2937	122.822	131.175	179.087	118.933	171.861	150.266	118.058	115.706	127.614	117.113	188.592	151.56	158.665	145.125	119.323	107.818	144.568	162.394	113.096	99.1798	123.909	125.236	122.856	91.7133	127.074	142.611	121.974	106.532	137.812	152.664	127.322	121.944	139.071	140.769	144.52	120.731	144.147	147.67	121.202
LOC102269444	275.053	158.255	272.292	250.158	200.322	244.877	286.591	217.25	276.369	213.93	282.267	253.915	299.268	244.545	262.349	215.473	281.389	282.067	336.239	306.974	301.967	291.583	261.284	222.907	252.621	175.624	257.651	233.941	210.86	179.618	241.372	230.881	234.835	134.916	215.945	238.295	246.414	180.894	265.459	207.231	286.122	230.781	316.851	236.423	290.481	202.36	269.331	223.354	210.113
ATP6V0E1	135.852	94.4701	106.712	129.381	121.743	109.33	117.006	155.358	157.64	104.264	140.684	148.644	101.574	163.664	131.119	108.394	115.601	200.339	142.883	126.549	136.183	172.907	136.575	104.15	133.879	140.616	129.951	142.048	124.187	113.795	120.941	153.526	140.172	90.8616	117.035	149.491	111.861	125.626	120.872	112.473	124.471	128.798	128.898	113.778	122.204	152.543	117.232	137.232	114.924
NDUFS5	150.008	75.7354	110.685	123.836	117.934	87.6651	111.174	136.334	144.926	98.1991	132.49	121.103	124.12	112.918	114.118	105.344	116.035	93.632	125.337	99.4775	162.156	133.351	123.168	97.2293	126.217	88.2453	133.228	138.408	109.672	87.4131	112.532	123.13	112.716	84.2494	103.125	128.033	112.209	83.2896	128.318	106.945	96.9209	97.3364	113.448	104.779	126.918	87.4192	110.513	118.689	121.692
TM9SF2	108	75.6683	96.0631	94.3949	82.7114	88.7058	77.4861	92.0051	136.275	99.5735	100.262	99.4943	92.0652	146.459	98.9868	76.7743	98.4569	110.982	101.467	78.3427	88.1602	112.017	102.996	74.4503	127.553	108.446	103.227	90.2194	130.03	98.3583	116.434	119.654	139.03	82.4686	109.279	101.071	111.147	100.212	95.4103	77.4567	101.208	114.118	95.4395	83.1822	115.928	114.439	107.437	101.156	122.483
LOC102271944	210.606	143.894	141.446	143.384	172.838	179.716	113.083	172.912	194.838	158.629	130.454	135.532	193.852	228.163	152.151	127.515	143.109	166.174	156.562	126.536	226.961	197.616	153.407	138.267	179.791	149.631	138.448	135.529	187.545	144.274	121.614	132.252	200.528	120.702	150.898	141.811	166.639	157.072	178.466	149.424	160.063	180.554	150.932	152.712	190.98	151.591	168.198	160.082	186.691
CHMP2A	101.085	62.3174	80.6772	94.4725	82.4516	96.8886	98.834	98.8919	132.509	86.0574	108.04	118.396	105.006	107.776	106.074	119.457	78.7447	102.216	97.5787	82.6945	127.473	160.618	114.588	95.1783	106.058	82.9261	98.7112	103.109	103.25	85.6635	108.336	100.406	109.849	64.0921	108.163	149.51	92.0497	78.4956	119.305	112.433	112.892	90.2087	124.182	109.474	109.699	92.1682	112.946	106.641	100.804
PFDN5	156.679	100.269	154.314	155.743	163.027	148.495	155.281	169.053	134.039	106.093	123.801	136.566	166.155	153.907	145.378	137.867	179.952	164.513	219.078	160.145	207.194	179.694	177.872	122.684	156.245	164.98	146.98	209.353	132.469	142.9	117.999	122.171	117.03	118.908	120.386	104.729	126.824	150.694	145.815	131.121	103.626	182.387	131.674	117.451	166.922	164.611	155.814	164.262	153.666
HNRNPU	110.853	68.9045	110.467	103.274	95.5738	81.7321	74.7666	91.1606	116.661	76.5922	88.9068	94.6631	164.416	127.471	124.096	119.461	129.953	118.462	125.616	117.705	111.407	89.3799	108.663	96.1406	112.722	79.5594	90.1972	92.7623	107.215	68.587	89.8981	102.247	107.047	64.132	89.2416	97.7402	108.546	73.4811	116.426	90.8377	116.913	85.8082	118.48	102.439	97.717	94.4261	86.9827	90.7298	109.391
MRPS15	51.7049	34.6036	41.6766	45.7819	43.9677	39.5075	32.2177	42.0952	60.4601	46.2221	45.3049	43.479	39.8184	46.8424	37.0803	36.3429	27.4448	30.5374	33.0831	26.5704	47.5955	56.1784	33.4562	27.5803	44.6531	43.1275	44.6044	48.846	38.588	36.7427	43.8088	39.9445	42.7458	40.382	41.3598	53.7892	36.4523	30.5689	43.8654	35.4106	34.8649	35.9393	47.1236	37.4161	38.2783	33.8001	40.1719	36.7522	36.9651
MYH9	135.307	81.2914	213.371	134.731	112.324	123.277	158.065	121.636	148.992	115.388	139.6	116.322	139.471	129.691	126.93	119.32	182.252	160.166	121.286	137.905	136.652	135.018	127.062	132.667	120.606	115.396	137.77	94.2084	129.759	104.357	149.29	140.495	143.281	91.5099	146.119	137.614	121.058	106.183	102.145	115.736	163.114	131.841	160.615	142.551	113.424	115.607	99.9248	102.289	110.872
OS9	104.275	108.772	106.502	101.495	95.4706	134.667	90.1074	101.321	117.066	118.382	127.305	121.896	103.711	138.6	88.8581	72.7521	98.0895	166.422	107.876	86.5965	121.102	124.494	90.4243	71.1466	135.722	156.652	130.37	128.544	135.426	141.691	135.427	133.068	135.532	126.546	131.931	134.747	108.148	138.239	112.086	104.493	95.4656	142.145	93.8631	92.0559	128.003	159.446	126.162	119.963	120.186
ATP5O	236.597	172.227	174.806	232.268	196.421	178.612	166.559	239.845	255.817	209.767	238.587	241.605	166.665	261.268	172.919	187.395	124.754	173.914	136.209	130.59	192.493	286.948	155.007	158.562	217.044	198.835	250.533	269.574	184.468	208.839	216.565	225.866	205.697	168.555	195.077	253.709	183.477	158.714	232.418	200.581	177.873	175.892	215.884	195.924	168.736	171.141	182.095	178.181	191.136
EIF3G	116.507	63.274	117.207	114.284	102.855	83.6601	98.2576	104.692	132.116	72.189	108.595	111.357	145.153	108.667	113.707	126.459	129.523	120.402	141.645	122.664	174.917	142.747	125.538	105.187	126.443	89.0643	128.97	145.814	109.653	74.9413	110.916	112.302	115.664	65.6948	101.099	125.325	107.369	84.8391	123.205	102.004	101.195	98.5367	123.522	92.6404	125.079	95.4473	114.445	117.358	116.51
SSR2	220.075	183.61	203.363	230.14	181.291	203.135	187.204	230.512	220.047	199.819	183.748	201.588	205.452	366.013	204.085	208.341	270.835	300.857	326.327	251.571	283.485	380.403	240.584	173.971	243.699	220.758	221.179	269.614	197.205	192.729	194.015	222.084	212.15	169.213	225.836	251.982	216.846	244.382	225.966	198.36	181.725	262.811	220.494	187.969	251.433	229.924	278.156	268.313	231.731
EIF4A2	112.562	80.6128	101.284	112.728	125.452	110.559	105.586	124.018	103.15	89.7043	92.3184	101.269	159.268	129.541	120.672	118.376	159.913	123.462	180.764	134.788	133.607	95.0185	122.577	95.6381	115.357	121.456	106.83	123.323	110.498	132.521	85.1169	88.809	102.186	110.663	99.336	75.68	123.462	129.345	106.085	99.1446	93.4687	143.823	91.2503	90.9911	128.957	133.167	103.72	125.847	111.653
MORF4L1	124.37	96.6122	124.265	105.541	142.217	123.761	124.05	119.968	89.7674	115.153	113.848	104.358	175.479	175.08	119.796	125.033	152.918	146.02	144.501	142.287	149.356	167.195	117.535	134.414	113.13	113.797	102.684	129.469	111.572	112.875	82.1183	92.4475	87.3369	104.045	92.4155	79.477	112.99	133.926	99.4095	106.856	129.596	149.506	120.596	122.026	109.116	151.312	103.002	108.442	107.181
NUCB1	133.495	94.8292	125.927	138.635	154.736	128.103	145.395	159.311	132.985	104.332	149.906	136.099	125.237	148.876	96.5719	88.5016	180.283	212.63	157.334	131.576	151.558	158.977	99.7577	88.8349	144.909	153.141	150.015	149.109	172.835	143.957	148.419	157.749	144.953	116.328	152.267	130.668	142.61	173.732	113.81	119.746	130.5	197.801	107.058	118.351	142.022	149.329	128.607	128.191	176.677
NDUFB8	111.38	80.4502	117.943	136.069	109.893	95.6959	109.145	146.21	108.601	93.6142	129.555	131.304	77.6827	110.007	93.0056	100.672	72.8997	83.0884	86.5482	84.8774	89.7607	124.915	84.4177	96.4331	95.3273	93.1572	127.296	144.925	93.9153	86.8565	115.294	126.704	87.9477	67.1803	102.288	130.722	85.5501	72.9845	107.589	114.59	80.8182	87.2482	106	111.388	85.3257	85.4147	93.4573	105.471	106.666
DBNL	119.518	64.6418	127.944	113.959	100.347	75.7097	100.754	120.824	130.965	76.7664	117.175	128.579	118.105	117.929	140.038	132.67	102.089	115.721	134.784	119.243	110.589	118.416	120.513	97.8788	113.909	75.426	116.973	116.047	107.075	71.003	121.46	125.475	110.334	58.0351	112.798	146.554	110.542	72.4366	137.608	121.561	120.725	88.4691	149.006	122.703	104.969	93.6807	115.024	116.588	94.3016
SH3BGRL3	161.829	96.9619	154.389	130.556	132.94	127.913	143.968	137.651	202.72	103.787	140.942	120.953	151.479	124.407	179.731	127.582	141.348	129.418	187.468	139.391	242.616	168.783	201.983	168.349	157.16	99.9194	151.649	154.661	141.885	104.031	133.703	140.164	160.153	84.8009	134.249	174.806	147.679	122.032	161.715	126.231	180.369	161.882	165.089	149.139	154.158	129.972	162.345	115.537	176.665
PPIB	284.875	207.37	266.284	303.867	187.375	203.12	226.531	267.413	304.1	243.824	301.901	288.554	341.88	392.544	298.199	343.757	336.734	335.352	372.381	310.126	390.268	501.393	311.139	292.729	308.005	239.287	330.703	299.783	258.725	191.044	305.955	319.854	322.92	161.082	290.731	400.365	313.99	285.217	336.443	275.357	355.343	274.455	355.76	303.704	295.717	242.198	308.438	270.209	274.973
LOC102265903	110.148	94.2184	96.953	106.983	92.0299	136.841	92.2413	90.3158	129.853	130.202	115.519	111.666	176.791	172.733	141.654	137.897	145.003	173.395	131.733	140.291	119.283	166.718	124.615	113.892	133.918	138.751	96.0223	107.959	110.326	117.243	111.06	118.385	129.375	96.7725	103.542	133.826	115.142	112.962	115.306	101.432	114.079	135.938	140.935	112.532	99.7817	168.954	108.872	115.655	98.2342
MTCH1	81.1536	91.7825	103	92.0835	91.3732	105.308	108.416	100.321	75.0277	101.258	98.9559	89.1918	106.366	151.704	102.79	110.803	128.648	185.826	126.083	120.272	121.538	158.426	109.651	118.755	79.6315	123.54	93.0961	108.734	85.4992	117.056	90.5285	89.3496	72.3417	111.014	87.2419	88.7016	91.4884	120.503	90.2737	103.29	100.512	142.282	104.658	101.826	99.5283	132.078	104.685	124.246	99.1115
ARPC3	113.683	76.8327	108.671	101.53	76.4467	96.474	101.01	98.3449	131.783	105.113	114.153	109.945	123.698	145.117	124.464	101.748	127.873	149.136	172.764	117.947	132.211	167.5	140.95	93.7072	109.611	84.1652	99.9286	96.2664	105.543	91.5939	101.277	111.982	122.154	70.1155	90.3842	126.662	109.787	104.078	141.125	108.191	131.91	108.297	145.749	117.585	121.363	114.924	118.052	115.887	91.9103
UBB	422.121	297.094	410.412	485.98	532.685	444.635	408.936	484.045	322.436	374.321	354.864	531.432	458.521	500.305	402.296	425.426	460.992	676.517	528.524	553.418	403.93	567.575	403.994	414.553	593.064	473.8	415.239	746.898	530.868	422.919	315.142	459.722	385.937	384.242	335.924	455.273	406.878	523.657	438.102	568.034	416.513	626.126	506.451	505.949	430.406	612.739	490.196	521.337	487.209
TMED10	96.6903	76.1207	93.2977	106.948	75.474	93.7959	88.8178	98.1126	108.386	106.429	104.104	105.687	98.6504	200.86	117.157	121.586	106.341	165.094	119.648	108.546	86.7614	156.23	117.818	108.187	97.568	112.529	111.83	96.9461	95.5168	101.639	117.696	113.466	110.541	86.6665	114.539	118.148	91.1578	115.765	108.105	80.1374	92.6861	107.219	109.76	93.9469	91.083	112.654	107.034	98.3397	87.0424
RPL18	1146	593.88	1200.09	1051.66	949.409	743.62	975.308	1117.87	1020.97	636.38	886.588	945.503	1069.34	1131.44	1130.66	1002.09	1149.63	1100.98	1567.38	1163.28	1418.62	1263.25	1278.41	868.293	1125.48	905.625	1261.21	1286.42	933.941	785.789	1113.12	1078.41	904.837	627.206	1100.84	923.534	824.661	767.01	1008.49	880.212	642.592	882.123	998.264	828.657	1144.55	910.411	1235.33	1144.22	1133.92
DDX17	152.014	127.392	150.509	152.714	184.921	202.73	149.991	187.988	140.068	117.013	124.879	145.762	173.568	249.4	168.88	174.897	182.508	236.6	186.31	189.027	163.136	163.544	174.553	174.128	157.821	177.977	124.353	146.517	161.338	142.111	136.086	148.031	150.042	156.642	162.141	116.044	186.325	195.036	151.562	182.834	120.847	219.881	114.554	138.513	156.566	228.159	168.069	207.791	170.155
CFL1	280.962	222.552	316.859	283.248	234.982	284.341	279.766	257.362	306.538	288.873	343.193	294.378	269.254	298.524	237.319	272.554	149.165	244.608	213.912	170.855	268.106	376.268	237.179	266.709	244.084	181.921	304.021	257.09	250.71	224.055	280.792	286.182	282.627	165.394	245.83	368.807	229.424	230.085	282.276	237.483	337.584	249.933	326.611	294.923	217.484	209.324	235.196	188.907	251.041
RTN4	118.208	76.1881	144.819	129.344	139.37	115.284	157.926	155.086	114.217	84.0531	163.046	152.487	91.0404	126.068	82.1201	77.528	106.864	119.894	109.199	136.424	95.1535	109.077	87.3469	122.819	93.3799	113.518	148.062	153.337	109.682	105.067	147.167	132.775	116.635	85.8249	138.734	118.304	99.6485	104.565	88.718	106.256	96.6485	141.042	98.8071	104.97	96.6234	112.336	95.0106	92.5855	112.812
HMGB1	171.64	94.6244	134.337	135.406	126.952	102.436	99.4409	122.541	151.319	115.226	148.983	126.54	161.99	121.733	136.759	124.902	97.5912	117.102	120.136	98.614	160.035	113.366	134.152	118.896	124.705	77.2438	126.707	112.766	114.514	79.5153	116.199	109.585	129.76	72.6641	100.765	113.135	136.387	85.6351	163.395	115.706	175.617	91.769	177.667	147.487	147.661	104.245	121.585	124.851	108.657
ATP5F1	203.297	148.921	125.701	188.618	148.058	138.355	121.019	168.521	208.105	202.633	180.989	187.042	119.545	212.05	120.973	128.933	97.9809	127.098	100.218	96.8491	134.414	203.464	105.664	102.904	188.481	191.814	190.919	181.037	160.106	180.695	155.176	184.028	201.249	156.279	167.925	220.909	150.122	132.215	187.37	149.589	152.286	157.847	166.13	147.363	139.413	152.72	140.616	155.331	171.943
ERGIC3	92.897	92.5319	97.1826	88.7237	71.0886	109.89	78.562	90.9389	83.2121	92.3141	83.5657	88.8988	87.461	133.177	83.1796	67.1011	98.4213	124.596	114.223	91.1346	111.523	134.553	88.7675	67.0084	96.5551	146.457	104.02	109.015	93.0781	122.938	102.794	104.282	88.2367	103.263	99.8668	81.6821	97.2942	119.347	92.6353	89.0347	61.9842	141.772	73.2468	73.0265	104.863	141.739	113.965	101.91	102.911
HNRNPM	94.8008	73.6423	112.319	87.9847	81.3506	88.0011	81.6053	81.266	110.682	86.2061	99.7796	97.9946	161.926	154.454	131.423	137.059	90.7692	92.286	89.5769	89.1176	133.514	158.366	123.474	122.92	106.585	84.1225	93.5926	101.115	96.7668	78.0976	86.1533	96.8758	109.223	70.8953	93.8107	115.528	108.802	75.0282	120.092	107.075	125.218	78.8742	128.212	114.145	97.0557	91.9196	85.6683	90.5722	97.347
ATP5E	120.97	118.791	97.4049	120.485	85.4068	99.2338	92.4166	138.604	132.415	134.166	137.205	138.933	94.5468	137.012	105.992	122.352	63.7599	83.2927	98.305	75.879	115.771	145.148	97.3512	85.7425	93.7658	110.926	98.4935	129.401	85.685	113.499	110.527	136.782	108.071	99.2656	101.693	144.426	90.6971	85.5981	143.789	110.81	85.0103	72.7032	116.917	97.1729	93.7096	87.1369	110.774	117.101	94.5332
EIF3F	122.112	55.6363	120.894	112.413	111.782	70.6197	94.9595	108.843	104.956	54.1299	101.773	100.529	103.006	82.3022	98.4279	95.091	126.152	111.774	144.049	120.76	125.37	91.2569	100.92	82.2352	115.6	79.6422	126.251	152.058	123.791	80.0584	112.017	118.356	103.551	71.9917	114.394	105.548	96.3811	85.0818	94.0784	93.5854	74.2874	107.198	81.9546	84.1684	124.984	95.6272	109.972	110.178	131.668
HNRNPA2B1	258.586	150.489	210.533	199.2	218.462	185.482	153.483	173.49	261.556	181.366	204.539	191.523	353.786	268.073	241.119	259.856	211.892	198.346	188.725	189.521	243.506	225.804	213.048	216.343	240.562	154.767	183.857	164.208	223.917	136.27	178.078	179.968	252.506	137.265	165.152	213.521	242.739	167.042	224.136	190.402	284.872	163.808	217.297	211.399	202.53	185.015	124.5	180.654	171.822
LOC102274318	94.6114	116.157	123.942	114.77	82.3388	148.887	91.2295	134.647	84.9709	133.395	107.395	117.289	87.7989	182.485	122.595	111.44	65.0684	134.043	125.02	107.167	96.6892	154.47	139.737	118.951	94.0742	125.504	116.842	129.615	95.5015	112.602	114.573	122.012	85.6326	95.9773	121.134	117.702	75.8402	127.579	132.404	125.024	76.0797	137.697	135.084	128.202	85.5816	134.407	132.155	129.055	112.568
KARS	199.386	90.6239	184.115	160.574	153.984	111.923	140.77	167.317	166.813	113.969	157.674	169.089	129.141	160.781	128.132	118.425	169.866	171.937	225.387	168.084	165.368	162.281	154.721	108.427	197.61	141.482	195.88	214.413	186.17	112.58	167.711	184.782	197.663	104.642	182.309	159.232	171.516	141.064	175.36	148.58	120.731	144.237	146.205	127.835	203.527	139.585	199.513	187.689	239.903
PRKAR1A	127.286	69.7698	157.32	126.787	133.599	103.619	123.371	132.364	137.897	79.9628	143.694	147.532	179.516	134.141	163.48	159.851	208.903	137.997	200.929	198.52	166.49	139.394	145.537	166.741	146.567	101.694	147.561	155.443	129.989	90.4629	118.138	142.857	134.927	80.3917	124.476	144.071	147.613	102.796	143.876	149.92	126.794	115.734	141.019	142.797	147.456	111.588	143.169	170.876	120.339
CTTN	118.296	54.4199	104.312	113.652	88.5319	70.023	97.5256	95.936	128.045	58.8439	106.997	109.087	110.361	93.7777	122.134	113.646	111.257	91.7441	120.125	104.736	115.098	108.16	129.277	103.169	122.569	63.3227	108.626	106.176	106.874	50.9533	109.067	109.539	124.901	47.1256	107.498	127.133	115.307	73.9618	129.961	108.892	106.896	71.8217	121.957	104.415	104.557	73.1686	106.832	107.499	98.7712
LOC102266785	133.6	89.8614	122.412	108.649	126.438	108.456	133.985	141.491	130.072	101.072	127.012	109.471	99.0989	171.828	97.8217	77.0669	118.986	164.502	172.1	120.615	136.539	166.799	112.108	87.0005	122.879	105.427	140.555	129.339	125.785	107.244	115.996	116.052	112.108	92.2795	96.1471	91.7089	100.616	104.581	99.8678	83.7449	96.8992	130.843	105.24	95.6939	106.42	122.363	97.784	92.2781	111.848
EIF3H	195.367	89.0691	172.862	143.85	172.419	112.216	154.467	157.856	166.627	94.5088	138.693	146.061	148.826	137.311	137.27	128.085	204.538	172.142	221.452	204.178	191.615	133.929	147.862	106.712	186.242	116.885	157.247	183.1	176.706	118.001	139.858	148.035	153.744	94.7772	139.817	112.736	142.429	121.084	138.951	118.596	112.767	149.453	132.286	121.057	186.079	138.907	155.339	165.867	191.125
PRDX2	205.826	234.513	178.752	223.059	234.535	240.275	198.794	284.947	232.039	281.494	208.524	233.402	126.094	304.099	172.377	165.601	110.45	180.061	179.201	139.651	199.395	301.576	203.912	175.195	166.726	337.91	218.591	243.062	183.689	272.232	199.847	227.6	193.17	204.038	205.371	245.794	187.445	185.555	282.806	245.187	203.877	208.114	245.255	239.64	189.321	174.508	261.099	209.9	223.437
EIF3M	146.43	85.2739	118.902	116.256	131.044	103.232	94.2175	119.439	143.681	83.9943	109.606	120.927	117.295	128.023	103.049	96.5513	183.169	168.245	181.084	160.549	115.711	117.962	112.195	77.6388	126.715	103.723	119.476	148.874	135.602	115.503	100.671	104.863	149.55	113.297	125.091	105.877	123.53	117.08	127.013	105.209	97.0687	146.975	109.228	101.148	199.012	136.68	142.705	148.659	152.528
SHFM1	153.712	87.7743	116.048	129.934	149.845	114.141	131.674	149.723	185.824	104.974	146.693	159.517	227.095	186.559	175.9	168.304	154.846	142.832	156.198	128.336	181.279	161.476	143.478	127.676	174.06	87.646	125.502	168.827	148.423	89.9268	104.216	132.905	183.638	78.2033	125.99	159.732	148.674	111.632	176.151	136.239	169.753	111.395	173.879	140.167	159.459	128.807	133.714	138.967	153.024
TBP	6.34778	4.18904	7.55591	5.90144	5.73971	4.78442	4.77969	5.82792	7.47565	5.1721	6.50041	6.06829	9.72141	6.7757	7.28732	6.38585	6.85225	6.7216	7.61899	7.49178	9.43537	5.94588	6.67228	6.76287	7.4665	3.70732	4.3599	5.96043	6.45031	3.1405	5.67122	5.80083	6.65631	3.54421	5.37123	6.85478	8.1521	4.75997	7.61556	6.07756	7.88255	4.95917	7.67132	6.13698	6.10669	5.11053	6.18943	6.25012	6.25263
MRPL39	38.4675	17.0954	25.144	29.306	24.8203	17.8575	21.9527	27.3793	33.474	20.2634	27.8792	25.1292	19.885	25.5902	16.4314	18.9543	20.0903	25.2144	18.1494	17.0474	17.4852	22.3122	16.4511	14.2376	30.7704	18.3178	26.046	25.6109	22.6545	17.1145	24.171	21.6451	25.8611	16.4861	19.7168	22.394	25.7883	16.7434	26.649	16.252	23.0559	18.6772	23.9385	20.2323	26.482	20.8718	20.7597	22.3058	28.4294
RPS15	858.962	435.243	902.968	823.704	606.936	514.423	703.012	774.647	752.652	467.814	739.488	750.831	800.236	788.328	987.685	868.764	848.652	821.041	1289.43	932.155	1113.73	923.096	1055.46	713.364	788.771	636.687	1014.88	1004.03	600.496	524.889	801.38	700.442	563.01	404.428	791.039	782.462	591.222	560.038	914.312	750.838	523.599	598.788	887.214	693.188	783.289	602.993	914.647	886.669	777.03
YWHAZ	112.774	90.619	114.069	109.344	94.9487	141.476	88.8404	90.5404	126.882	124.711	112.118	119.7	176.513	181.355	161.475	145.023	136.876	172.776	148.367	137.103	103.053	129.89	150.387	138.763	119.557	100.019	115.765	89.6809	96.3542	83.439	87.9871	89.3934	135.539	72.1276	88.0573	104.894	121.556	106.247	107.211	106.663	155.648	112.232	151.943	149.347	94.9639	119.343	106.461	107.125	78.2612
RPS23	933.428	451.637	1056.06	944.022	683.031	596.071	906.752	957.033	889.809	529.291	975.109	911.912	901.958	959.785	1149.56	1019.23	1001.22	951.272	1617.84	1138.6	1092.05	939.029	1257.28	857.672	775.46	560.28	1144.25	1032.61	678.553	548.577	939.051	859.643	679.396	438.428	937.306	929.011	675.268	578.672	1051.43	853.533	660.363	678.115	1063.23	894.985	882.12	710.367	1107.58	1007.47	741.041
UXT	25.6756	10.5481	21.7982	22.6609	13.5347	14.2035	16.3151	20.1757	19.6496	11.264	24.3702	19.7254	12.6927	16.0032	14.9376	10.7208	10.7452	13.5845	16.7267	12.8685	17.7867	17.0337	14.48	11.5857	18.1115	15.054	23.3571	19.5593	16.6075	13.0907	21.4548	22.1221	18.4073	12.9004	19.0763	20.5496	11.3615	12.3696	17.0496	13.6821	12.5451	12.0322	15.3575	11.9479	13.761	12.5265	13.8426	14.4674	18.045
RPL13A	1134.6	498.234	1063.67	1046.92	897.793	605.635	897.884	1080.08	1048.88	495.108	973.647	1012.07	1011.08	682.179	1013.52	883.473	1309.64	815.065	1589.22	1258.98	1376.95	784.83	1140.88	809.617	1098.26	631.56	1135.69	1301.74	907.612	558.626	895.418	944.493	877.466	459.546	986.851	928.808	842.212	590.219	1043.14	931.382	693.168	715.071	873.434	870.692	1101.23	678.861	1106.9	1151.85	1007.76
RPS9	766.237	303.292	764.567	644.586	475.019	321.967	527.697	590.351	704.742	357.697	660.838	691.64	844.194	644.595	843.494	668.744	936.146	647.992	1225.65	916.241	1147.31	780.619	1055.68	657.815	776.839	404.498	787.981	750.309	673.043	380.67	715.995	718.725	688.818	321.144	774.908	725.827	680.048	434.226	867.668	718.417	534.677	489.971	779.782	652.552	898.905	528.567	896.389	865.506	699.506
DDX54	25.4699	12.7752	27.1496	25.0141	19.186	13.9439	18.7304	21.67	30.4481	16.4933	34.2544	31.5772	45.2657	31.9779	40.7592	48.4925	31.7866	32.4743	35.7984	32.9619	38.7216	32.785	36.3959	36.8093	30.9009	15.3622	31.7894	33.853	26.7157	15.46	35.7639	26.8831	30.2676	14.132	23.0278	34.6119	26.5413	20.1175	31.6823	25.8131	26.8976	17.4435	40.5285	24.4633	27.1623	22.3543	27.5519	23.374	21.1407
ACTB	1711.99	994.646	2356.71	1927.39	2312.83	1558.45	2630.33	1972.98	1149.4	1053.95	1689.25	1505	1881.24	1203.68	904.603	1470.96	945.046	1511.16	947.681	1143.77	1185.05	1710.11	825.709	1865.96	1266.41	723.463	1341.32	1633.94	1354.87	796.58	1119.29	1262.44	852.86	553.31	1165.55	1302.01	1008.12	1064.3	1035	1352.79	1399.73	1296.56	1323.69	1600.27	1050.6	883.84	984.12	1027.17	1359.35
HMBS	24.2616	17.6111	23.5445	23.8263	25.2885	29.7149	19.2295	26.7621	19.5005	24.9242	25.9345	20.5651	13.1297	24.6633	15.4964	20.8081	8.03762	17.8817	11.9735	9.22566	15.71	35.1794	12.3818	14.7431	17.3165	18.7278	20.829	21.5573	14.3648	19.0383	19.2303	19.966	12.7397	14.8382	15.9581	19.0807	11.6322	15.7542	14.9424	12.0312	14.6425	17.8148	18.7191	16.7227	10.2027	19.4968	12.9366	11.7565	10.3777
GAPDH	593.036	521.488	747.417	726.656	649.689	696.657	864.333	710.048	574.695	594.434	1398.97	794.316	439.914	532.523	636.396	670.08	977.39	983.778	998.362	1136.15	588.412	791.684	596.382	751.821	649.875	621.615	1556.05	1147.07	548.614	466.254	1128.75	816.228	595.133	379.677	885.095	963.862	486.851	415.541	720.996	711.54	951.241	652.412	943.046	994.145	440.872	321.796	514.535	425.86	617.499
DBNDD2	11.0646	13.4271	17.0747	11.7731	9.67219	18.507	19.3747	11.1403	13.3393	13.7226	21.1046	15.2491	15.821	22.5208	15.4541	16.0272	14.1867	36.1091	31.2927	20.8525	10.7332	25.7884	14.7886	20.3052	15.1892	16.6658	15.0011	16.3821	14.0839	16.2573	10.1653	8.25861	10.2699	12.3544	14.0406	22.5098	13.2174	17.4954	25.6076	16.9308	15.7912	21.9849	30.8364	16.3476	14.2714	20.6256	26.542	18.3755	11.5224
[truncated: 14 more columns]

## Sheet: Sheet2
	Adult_1	Adult_1_Abo	Adult_1_Oma	Adult_1_Ret	Adult_2	Adult_2_Abo	Adult_2_Oma	Adult_2_Ret	Adult_3	Adult_3_Abo	Adult_3_Oma	Adult_3_Ret	S0d_1	S0d_1_Abo	S0d_1_Oma	S0d_1_Ret	S0d_2	S0d_2_Abo	S0d_2_Oma	S0d_2_Ret	S0d_3	S0d_3_Abo	S0d_3_Oma	S0d_3_Ret	S15m_1	S15m_1_Abo	S15m_1_Oma	S15m_1_Ret	S15m_2	S15m_2_Abo	S15m_2_Oma	S15m_2_Ret	S15m_3	S15m_3_Abo	S15m_3_Oma	S15m_3_Ret	S20d_1	S20d_1_Abo	S20d_1_Oma	S20d_1_Ret	S20d_2	S20d_2_Abo	S20d_2_Oma	S20d_2_Ret	S20d_3	S20d_3_Abo	S20d_3_Oma	S20d_3_Ret	S60d_1
HNRNPL	131.637	113.483	141.333	140.211	129.397	141.503	113.929	136.232	145.152	126.199	149.28	141.045	154.224	203.604	146.812	144.725	144.96	161.732	154.24	139.586	148.737	199.034	122.662	133.459	132.981	142.648	135.558	134.621	130.276	122.48	136.534	134.585	140.608	111.493	138.14	152.109	147.066	146.88	154.153	146.361	167.521	164.714	167.422	162.917	137.544	142.203	144.25	141.097	123.834
HNRNPK	192.015	117.312	182.512	169.36	173.618	143.369	157.342	167.232	196.433	136.026	163.273	170.576	219.55	220.517	171.481	172.235	198.017	209.421	178.71	167.1	193.541	179.179	177.806	181.508	188.416	143.425	156.515	170.786	178.865	120.676	149.106	166.371	185.979	108.18	153.597	153.155	182.951	147.769	174.833	147.911	182.521	156.534	189.974	172.889	181.398	171.016	172.794	172.418	171.635
SERF2	162.268	114.464	148.577	155.483	160.171	142.27	149.287	160.239	135.968	124.161	161.469	155.834	182.016	181.048	132.884	139.005	131.553	152.622	139.927	126.458	189.017	217.411	126.101	130.134	151.683	128.707	168.818	172.669	142.051	131.059	142.861	154.397	141.104	104.743	137.945	146.778	146.613	148.099	136.93	144.895	152.443	145.098	144.833	143.961	138.432	126.037	134.06	125.723	145.223
PCBP2	207.911	173.521	230.677	197.544	198.86	242.474	218.261	231.776	212.64	235.302	239.2	209.95	223.696	304.356	234.002	224.391	252.639	307.578	275.024	237.686	219.005	254.395	226.856	182.945	242.351	295.978	266.071	264.623	222.838	270.64	233.138	236.302	203.651	236.607	229.958	218.255	223.076	248.819	236.259	212.972	189.769	323.681	232.806	213.249	249.381	298.869	279.52	257.645	231.272
OAZ1	220.168	179.473	243.728	229.927	194.08	220.928	209.24	282.381	225.05	214.748	264.068	277.704	278.987	304.597	247.755	292.574	239.072	243.98	270.337	268.523	270.215	348.929	241.883	253.079	242.356	231.05	229.419	291.42	228.078	211.64	225.887	260.181	234.034	188.79	210.198	315.488	210.733	231.268	248.709	247.802	242.114	228.481	262.636	255.463	224.666	248.188	254.133	280.541	202.711
GNB1	110.229	103.305	127.384	116.186	118.594	138.157	144.726	125.351	113.44	135.575	137.87	121.97	130.016	183.81	124.795	123.386	117.322	157.97	123.244	125.125	121.407	170.264	120.893	127.478	109.005	134.327	125.285	117.926	107.077	125.105	128.292	113.889	111.674	107.365	135.675	116.667	115.281	137.254	108.055	115.758	119.535	158.746	116.507	122.365	117.845	148.612	127.354	117.487	119.364
PCBP1	121.657	85.3494	146.735	120.754	127.079	113.228	143.819	124.945	147.189	118.073	152.159	141.611	133.606	155.154	142.872	138.782	103.9	118.361	104.443	115.835	108.842	155.166	107.02	127.656	149.143	109.461	143.861	153.237	142.428	96.8279	149.086	135.036	127.668	82.1299	130.127	154.124	111.074	105.177	118.513	117.827	130.678	123.25	142.627	133.806	107.872	121.864	117.339	112.988	124.374
CNBP	162.575	104.753	150.975	152.157	160.542	131.671	139.416	173.553	140.995	113.134	158.581	145.543	170.996	135.614	123.844	135.081	168.259	142.857	168.093	141.14	155.093	132.495	127.272	124.915	142.019	106.431	137.103	146.473	139.435	102.885	132.805	133.024	122.089	84.4661	118.46	116.15	122.845	106.316	132.542	117.872	122.286	120.309	146.389	118.844	135.724	134.282	135.302	131.584	130.276
RPS15	858.962	835.243	902.968	823.704	606.936	814.423	703.012	774.647	752.652	867.814	739.488	750.831	800.236	788.328	787.685	868.764	848.652	821.041	889.425	732.155	813.729	923.096	855.461	713.364	788.771	636.687	914.883	904.028	600.496	724.889	801.38	700.442	563.01	704.428	791.039	782.462	591.222	560.038	914.312	750.838	723.599	598.788	887.214	693.188	783.289	602.993	914.647	886.669	777.03
CTNNA1	154.03	99.2524	123.024	118.915	124.562	134.418	116.056	121.001	162.687	150.12	152.962	142.722	143.111	173.896	139.207	109.969	135.178	146.587	121.54	102.221	139.572	139.483	144.591	109.868	167.875	138.157	150.44	130.668	159.439	123.454	161.689	160.058	173.723	103.724	146.914	129.4	144.638	124.189	121.915	111.458	129.692	142.131	123.353	111.906	146.896	144.427	121.788	114.041	153.805
LOC102266153	192.934	161.345	190.418	193.769	202.773	178.193	231.458	214.387	171.552	150.582	221.071	199.064	263.88	247.732	192.294	246.578	235.248	256.625	227.95	228.495	277.826	277.871	207.887	279.195	180.809	189.682	217.178	206.115	187.153	178.619	198.826	186.597	171.752	168.136	201.093	160.465	223.087	212.663	212.464	236.835	228.853	253.76	206.649	236.628	203.213	199.204	211.744	211.753	208.276
EIF4H	164.294	96.9083	170.342	153.512	161.354	125.308	160.998	163.526	170.994	114.969	174.504	162.84	174.606	156.042	161.673	162.276	174.847	156.615	181.688	169.669	173.261	168.031	161.41	163.889	178.714	117.502	195.155	199.873	167.931	106.477	183.719	173.823	160.02	91.5537	172.46	166.118	159.585	127.325	183.904	158.353	170.209	155.714	187.377	172.347	174.883	143.125	193.933	166.669	178.077
CAPZB	134.72	88.3177	138.41	130.521	116.12	128.44	135.43	136.583	130.786	115	143.48	129.058	108.086	138.969	104.871	104.677	112.586	150.742	132.484	111.195	124.927	160.378	113.246	108.849	107.813	87.4619	116.851	115.694	116.918	89.9085	125.344	130.127	118.973	73.5307	117.742	126.97	102.134	98.9239	129.064	106.132	116.58	117.499	132.379	119.156	129.01	107.786	145.879	123.028	116.081
UBL5	121.535	108.821	118.87	113.583	111.318	125.193	127.083	139.766	125.4	121.858	126.404	137.815	159.642	165.931	137.729	142.04	126.547	152.571	140.568	123.85	170.327	191.488	139.714	124.283	113.064	131.608	110.562	123.246	112.058	124.817	117.726	110.919	111.939	99.8041	110.755	129.415	117.519	113.943	134.048	116.041	131.865	123.783	146.2	127.44	110.795	130.187	123.238	108.872	117.838
RHOA	192.707	116.345	198.793	186.863	182.918	165.194	220.658	182.866	223.88	162.556	222.749	193.731	191.319	195.604	168.338	162.087	140.292	206.1	179.692	147.132	191.045	206.035	177.318	193.195	197.831	145.109	198.508	192.948	191.925	145.916	180.299	178.031	206.123	120.595	171.94	188.158	165.259	141.23	168.71	137.75	206.335	168.81	175.812	164.101	173.352	171.413	160.991	140.911	171.394
RAC1	186.667	148.141	190.963	175.518	179.063	212.26	179.17	194.282	189.099	184.583	207.779	190.19	156.501	242.492	153.94	143.694	156.065	227.55	182.137	143.333	176.979	230.138	171.05	147.711	173.793	177.628	175.865	169.589	183.289	197.764	176.603	182.699	191.891	156.243	180.383	187.854	154.143	184.133	159.976	149.28	156.941	202.404	162.979	155.537	158.829	233.836	164.588	153.518	166.321
GABARAP	234.543	276.947	249.397	233.165	243.104	310.13	267.165	259.209	261.506	282.182	266.368	280.369	288.567	359.386	302.325	234.388	356.488	394.448	363.834	301.77	353.737	409.172	294.076	240.727	261.053	332.603	243.5	297.386	290.307	321.596	238.572	264	282.118	284.349	276.921	296.844	234.06	287.713	281.448	224.561	252.885	314.402	239.904	237.264	272.348	324.618	290.155	274.296	289.88
DCTN2	135.682	88.3562	135.17	122.673	162.317	133.243	133.585	151.377	117.36	87.9984	117.183	121.048	105.562	116.777	101.346	95.7534	146.039	146.544	166.288	140.074	133.711	123.438	121.307	104.854	125.161	118.169	120.243	155.353	124.444	106.919	103.465	116.481	106.397	95.7702	109.066	102.518	109.51	125.522	111.119	116.299	86.4606	148.257	95.8543	95.2566	124.305	119.537	119.89	129.276	144.679
CLTA	100.731	74.2433	94.5211	97.1987	105.061	100.479	101.77	118.276	131.726	83.496	111.868	121.908	120.798	127.254	118.194	112.15	166.085	154.495	162.574	125.038	132.657	151.79	108.248	85.6393	134.636	114.074	120.504	146.413	130.359	108.518	93.7404	111.667	120.733	93.6745	101.057	123.635	121.08	104.989	135.876	108.175	114.183	134.564	125.935	109.57	142.377	128.013	128.84	127.056	125.116
ARF1	212.902	178.311	181.105	221.47	156.626	211.744	175.104	192.855	258.82	217.46	229.544	237.833	256.162	319.126	263.826	260.723	214.809	253.125	243.931	255.995	237.122	336.95	252.117	224.786	214.233	217.137	189.435	207.159	203.182	203.528	216.14	226.618	236.315	160.453	198.41	265.652	219.149	211.225	255.067	209.993	221.517	215.44	254.531	210.335	214.794	233.825	235.846	214.013	190.958
NDUFB10	126.822	117.454	107.776	133.874	162.749	132.203	114.859	157.794	139.844	141.057	118.064	125.394	137.565	134.185	103.028	113.816	128.051	110.041	136.429	110.541	180.513	148.713	115.933	109.58	123.539	144.607	133.499	177.995	129.248	125.737	121.032	129.653	113.379	102.855	103.747	124.437	103.561	94.3207	100.82	112.112	95.0222	125.579	112.892	104.003	150.371	128.784	122.741	141.076	135.487
SRSF1	123.537	78.4608	121.822	109.912	105.518	97.5566	82.464	101.428	116.482	81.9279	84.2675	89.1992	145.414	127.671	121.737	131.817	118.987	91.5304	96.3442	99.6472	112.93	101.651	111.765	108.43	115.827	75.9706	102.116	96.2687	103.081	60.7141	103.241	96.6178	110.658	68.02	92.2879	97.1192	115.737	76.3744	105.094	98.1723	112.257	87.5265	111.285	99.3918	96.2741	83.9927	79.5112	98.8947	83.0294
YWHAE	203.697	132.105	186.619	179.544	143.998	143.608	150.403	148.393	207.625	163.824	174.75	167.979	238.658	240.68	202.996	194.668	178.759	181.704	196.273	174.321	224.772	224.933	199.571	158.514	187.783	140.978	186.016	155.064	154.496	135.897	180.78	165.463	197.046	115.262	167.76	181.608	186.119	127.715	212.303	154.819	202.168	138.647	217.246	170.661	191.431	148.2	193.212	163.473	178.254
ITM2B	662.139	470.03	708.228	798.926	659.896	731.348	667.461	903.985	699.217	700.103	648.855	769.802	841.542	830.493	705.505	582.2	863.061	652.24	1044.47	792.429	787.422	591.447	694.283	474.145	620.978	873.857	703.372	684.236	674.315	808.148	738.73	938.556	730.311	620.733	775.69	754.719	751.14	695.617	680.094	564.783	725.355	777.723	598.518	585.117	995.478	906.5	824.189	898.942	715.399
LOC102271874	96.118	65.0404	91.2796	74.5793	100.002	85.5901	98.854	89.3607	104.378	83.5249	92.9085	82.6831	102.335	119.699	92.126	81.7402	139.077	134.764	141.436	105.569	98.1836	101.025	102.349	74.7259	112.267	109.582	104.995	98.4984	107.642	101.701	95.1253	88.5028	107.1	91.3249	94.0408	73.9145	112.755	97.5197	89.1842	78.346	84.3757	116.408	86.6484	79.6982	124.278	111.295	101.201	107.644	117.025
SUMO2	192.373	110.052	161.483	168.388	180.023	125.928	138.419	176.605	175.703	131.906	175.557	163.53	214.915	155.985	181.554	152.678	175.925	149.766	200.717	143.148	222.123	150.465	175.323	136.901	182.533	120.723	176.842	191.406	170.681	114.581	145.835	152.872	175.215	99.5329	146.038	141.336	190.798	128.064	196.065	149.575	190.387	153.04	176.741	151.969	187.286	133.094	174.792	164.993	177.518
CTNNB1	119.076	66.5851	115.773	118.355	109.473	106.589	113.564	121.925	127.469	92.2743	133.673	123.699	149.703	190.006	163.977	135.574	113.941	146.159	118.36	108.148	110.485	143.381	147.864	116.159	129.778	107.317	138.339	109.295	111.661	84.2196	126.811	127.641	132.397	81.8151	129.803	113.178	111.335	124.363	127.344	107.857	101.116	134.811	136.534	125.743	108.406	146.888	133.404	124.128	110.115
RPS23	933.428	851.637	1056.06	944.022	683.031	896.071	906.752	957.033	889.809	829.291	975.109	911.912	901.958	959.785	1149.56	1019.23	1001.22	951.272	1017.84	1138.6	1092.05	939.029	1257.28	857.672	775.46	860.28	1144.25	1032.61	678.553	848.577	939.051	859.643	679.396	838.428	937.306	929.011	675.268	878.672	1051.43	853.533	660.363	678.115	1063.23	894.985	882.12	710.367	1107.58	1007.47	741.041
RALY	111.104	79.4327	126.113	115.361	106.556	106.847	114.556	120.98	112.963	97.2937	122.822	131.175	179.087	118.933	171.861	150.266	118.058	115.706	127.614	117.113	188.592	151.56	158.665	145.125	119.323	107.818	144.568	162.394	113.096	99.1798	123.909	125.236	122.856	91.7133	127.074	142.611	121.974	106.532	137.812	152.664	127.322	121.944	139.071	140.769	144.52	120.731	144.147	147.67	121.202
LOC102269444	275.053	158.255	272.292	250.158	200.322	244.877	286.591	217.25	276.369	213.93	282.267	253.915	299.268	244.545	262.349	215.473	281.389	282.067	336.239	306.974	301.967	291.583	261.284	222.907	252.621	175.624	257.651	233.941	210.86	179.618	241.372	230.881	234.835	134.916	215.945	238.295	246.414	180.894	265.459	207.231	286.122	230.781	316.851	236.423	290.481	202.36	269.331	223.354	210.113
ATP6V0E1	135.852	94.4701	106.712	129.381	121.743	109.33	117.006	155.358	157.64	104.264	140.684	148.644	101.574	163.664	131.119	108.394	115.601	200.339	142.883	126.549	136.183	172.907	136.575	104.15	133.879	140.616	129.951	142.048	124.187	113.795	120.941	153.526	140.172	90.8616	117.035	149.491	111.861	125.626	120.872	112.473	124.471	128.798	128.898	113.778	122.204	152.543	117.232	137.232	114.924
NDUFS5	150.008	75.7354	110.685	123.836	117.934	87.6651	111.174	136.334	144.926	98.1991	132.49	121.103	124.12	112.918	114.118	105.344	116.035	93.632	125.337	99.4775	162.156	133.351	123.168	97.2293	126.217	88.2453	133.228	138.408	109.672	87.4131	112.532	123.13	112.716	84.2494	103.125	128.033	112.209	83.2896	128.318	106.945	96.9209	97.3364	113.448	104.779	126.918	87.4192	110.513	118.689	121.692
TM9SF2	108	75.6683	96.0631	94.3949	82.7114	88.7058	77.4861	92.0051	136.275	99.5735	100.262	99.4943	92.0652	146.459	98.9868	76.7743	98.4569	110.982	101.467	78.3427	88.1602	112.017	102.996	74.4503	127.553	108.446	103.227	90.2194	130.03	98.3583	116.434	119.654	139.03	82.4686	109.279	101.071	111.147	100.212	95.4103	77.4567	101.208	114.118	95.4395	83.1822	115.928	114.439	107.437	101.156	122.483
LOC102271944	210.606	143.894	141.446	143.384	172.838	179.716	113.083	172.912	194.838	158.629	130.454	135.532	193.852	228.163	152.151	127.515	143.109	166.174	156.562	126.536	226.961	197.616	153.407	138.267	179.791	149.631	138.448	135.529	187.545	144.274	121.614	132.252	200.528	120.702	150.898	141.811	166.639	157.072	178.466	149.424	160.063	180.554	150.932	152.712	190.98	151.591	168.198	160.082	186.691
CHMP2A	101.085	62.3174	80.6772	94.4725	82.4516	96.8886	98.834	98.8919	132.509	86.0574	108.04	118.396	105.006	107.776	106.074	119.457	78.7447	102.216	97.5787	82.6945	127.473	160.618	114.588	95.1783	106.058	82.9261	98.7112	103.109	103.25	85.6635	108.336	100.406	109.849	64.0921	108.163	149.51	92.0497	78.4956	119.305	112.433	112.892	90.2087	124.182	109.474	109.699	92.1682	112.946	106.641	100.804
PFDN5	156.679	100.269	154.314	155.743	163.027	148.495	155.281	169.053	134.039	106.093	123.801	136.566	166.155	153.907	145.378	137.867	179.952	164.513	219.078	160.145	207.194	179.694	177.872	122.684	156.245	164.98	146.98	209.353	132.469	142.9	117.999	122.171	117.03	118.908	120.386	104.729	126.824	150.694	145.815	131.121	103.626	182.387	131.674	117.451	166.922	164.611	155.814	164.262	153.666
HNRNPU	110.853	68.9045	110.467	103.274	95.5738	81.7321	74.7666	91.1606	116.661	76.5922	88.9068	94.6631	164.416	127.471	124.096	119.461	129.953	118.462	125.616	117.705	111.407	89.3799	108.663	96.1406	112.722	79.5594	90.1972	92.7623	107.215	68.587	89.8981	102.247	107.047	64.132	89.2416	97.7402	108.546	73.4811	116.426	90.8377	116.913	85.8082	118.48	102.439	97.717	94.4261	86.9827	90.7298	109.391
MRPS15	51.7049	34.6036	41.6766	45.7819	43.9677	39.5075	32.2177	42.0952	60.4601	46.2221	45.3049	43.479	39.8184	46.8424	37.0803	36.3429	27.4448	30.5374	33.0831	26.5704	47.5955	56.1784	33.4562	27.5803	44.6531	43.1275	44.6044	48.846	38.588	36.7427	43.8088	39.9445	42.7458	40.382	41.3598	53.7892	36.4523	30.5689	43.8654	35.4106	34.8649	35.9393	47.1236	37.4161	38.2783	33.8001	40.1719	36.7522	36.9651
MYH9	135.307	81.2914	213.371	134.731	112.324	123.277	158.065	121.636	148.992	115.388	139.6	116.322	139.471	129.691	126.93	119.32	182.252	160.166	121.286	137.905	136.652	135.018	127.062	132.667	120.606	115.396	137.77	94.2084	129.759	104.357	149.29	140.495	143.281	91.5099	146.119	137.614	121.058	106.183	102.145	115.736	163.114	131.841	160.615	142.551	113.424	115.607	99.9248	102.289	110.872
OS9	104.275	108.772	106.502	101.495	95.4706	134.667	90.1074	101.321	117.066	118.382	127.305	121.896	103.711	138.6	88.8581	72.7521	98.0895	166.422	107.876	86.5965	121.102	124.494	90.4243	71.1466	135.722	156.652	130.37	128.544	135.426	141.691	135.427	133.068	135.532	126.546	131.931	134.747	108.148	138.239	112.086	104.493	95.4656	142.145	93.8631	92.0559	128.003	159.446	126.162	119.963	120.186
ATP5O	236.597	172.227	174.806	232.268	196.421	178.612	166.559	239.845	255.817	209.767	238.587	241.605	166.665	261.268	172.919	187.395	124.754	173.914	136.209	130.59	192.493	286.948	155.007	158.562	217.044	198.835	250.533	269.574	184.468	208.839	216.565	225.866	205.697	168.555	195.077	253.709	183.477	158.714	232.418	200.581	177.873	175.892	215.884	195.924	168.736	171.141	182.095	178.181	191.136
EIF3G	116.507	63.274	117.207	114.284	102.855	83.6601	98.2576	104.692	132.116	72.189	108.595	111.357	145.153	108.667	113.707	126.459	129.523	120.402	141.645	122.664	174.917	142.747	125.538	105.187	126.443	89.0643	128.97	145.814	109.653	74.9413	110.916	112.302	115.664	65.6948	101.099	125.325	107.369	84.8391	123.205	102.004	101.195	98.5367	123.522	92.6404	125.079	95.4473	114.445	117.358	116.51
SSR2	220.075	183.61	203.363	230.14	181.291	203.135	187.204	230.512	220.047	199.819	183.748	201.588	205.452	366.013	204.085	208.341	270.835	300.857	326.327	251.571	283.485	380.403	240.584	173.971	243.699	220.758	221.179	269.614	197.205	192.729	194.015	222.084	212.15	169.213	225.836	251.982	216.846	244.382	225.966	198.36	181.725	262.811	220.494	187.969	251.433	229.924	278.156	268.313	231.731
EIF4A2	112.562	80.6128	101.284	112.728	125.452	110.559	105.586	124.018	103.15	89.7043	92.3184	101.269	159.268	129.541	120.672	118.376	159.913	123.462	180.764	134.788	133.607	95.0185	122.577	95.6381	115.357	121.456	106.83	123.323	110.498	132.521	85.1169	88.809	102.186	110.663	99.336	75.68	123.462	129.345	106.085	99.1446	93.4687	143.823	91.2503	90.9911	128.957	133.167	103.72	125.847	111.653
MORF4L1	124.37	96.6122	124.265	105.541	142.217	123.761	124.05	119.968	89.7674	115.153	113.848	104.358	175.479	175.08	119.796	125.033	152.918	146.02	144.501	142.287	149.356	167.195	117.535	134.414	113.13	113.797	102.684	129.469	111.572	112.875	82.1183	92.4475	87.3369	104.045	92.4155	79.477	112.99	133.926	99.4095	106.856	129.596	149.506	120.596	122.026	109.116	151.312	103.002	108.442	107.181
NUCB1	133.495	94.8292	125.927	138.635	154.736	128.103	145.395	159.311	132.985	104.332	149.906	136.099	125.237	148.876	96.5719	88.5016	180.283	212.63	157.334	131.576	151.558	158.977	99.7577	88.8349	144.909	153.141	150.015	149.109	172.835	143.957	148.419	157.749	144.953	116.328	152.267	130.668	142.61	173.732	113.81	119.746	130.5	197.801	107.058	118.351	142.022	149.329	128.607	128.191	176.677
NDUFB8	111.38	80.4502	117.943	136.069	109.893	95.6959	109.145	146.21	108.601	93.6142	129.555	131.304	77.6827	110.007	93.0056	100.672	72.8997	83.0884	86.5482	84.8774	89.7607	124.915	84.4177	96.4331	95.3273	93.1572	127.296	144.925	93.9153	86.8565	115.294	126.704	87.9477	67.1803	102.288	130.722	85.5501	72.9845	107.589	114.59	80.8182	87.2482	106	111.388	85.3257	85.4147	93.4573	105.471	106.666
YWHAZ	112.774	90.619	114.069	109.344	94.9487	101.476	88.8404	90.5404	126.882	124.711	112.118	119.7	106.513	121.355	111.475	145.023	136.876	102.776	148.367	137.103	103.053	129.89	150.387	138.763	119.557	100.019	115.765	89.6809	96.3542	83.439	87.9871	89.3934	135.539	72.1276	88.0573	104.894	121.556	106.247	107.211	106.663	155.648	112.232	151.943	149.347	94.9639	119.343	106.461	107.125	78.2612
DBNL	119.518	64.6418	127.944	113.959	100.347	75.7097	100.754	120.824	130.965	76.7664	117.175	128.579	118.105	117.929	140.038	132.67	102.089	115.721	134.784	119.243	110.589	118.416	120.513	97.8788	113.909	75.426	116.973	116.047	107.075	71.003	121.46	125.475	110.334	58.0351	112.798	146.554	110.542	72.4366	137.608	121.561	120.725	88.4691	149.006	122.703	104.969	93.6807	115.024	116.588	94.3016
SH3BGRL3	161.829	96.9619	154.389	130.556	132.94	127.913	143.968	137.651	202.72	103.787	140.942	120.953	151.479	124.407	179.731	127.582	141.348	129.418	187.468	139.391	242.616	168.783	201.983	168.349	157.16	99.9194	151.649	154.661	141.885	104.031	133.703	140.164	160.153	84.8009	134.249	174.806	147.679	122.032	161.715	126.231	180.369	161.882	165.089	149.139	154.158	129.972	162.345	115.537	176.665
PPIB	284.875	207.37	266.284	303.867	187.375	203.12	226.531	267.413	304.1	243.824	301.901	288.554	341.88	392.544	298.199	343.757	336.734	335.352	372.381	310.126	390.268	501.393	311.139	292.729	308.005	239.287	330.703	299.783	258.725	191.044	305.955	319.854	322.92	161.082	290.731	400.365	313.99	285.217	336.443	275.357	355.343	274.455	355.76	303.704	295.717	242.198	308.438	270.209	274.973
LOC102265903	110.148	94.2184	96.953	106.983	92.0299	136.841	92.2413	90.3158	129.853	130.202	115.519	111.666	176.791	172.733	141.654	137.897	145.003	173.395	131.733	140.291	119.283	166.718	124.615	113.892	133.918	138.751	96.0223	107.959	110.326	117.243	111.06	118.385	129.375	96.7725	103.542	133.826	115.142	112.962	115.306	101.432	114.079	135.938	140.935	112.532	99.7817	168.954	108.872	115.655	98.2342
MTCH1	81.1536	91.7825	103	92.0835	91.3732	105.308	108.416	100.321	75.0277	101.258	98.9559	89.1918	106.366	151.704	102.79	110.803	128.648	185.826	126.083	120.272	121.538	158.426	109.651	118.755	79.6315	123.54	93.0961	108.734	85.4992	117.056	90.5285	89.3496	72.3417	111.014	87.2419	88.7016	91.4884	120.503	90.2737	103.29	100.512	142.282	104.658	101.826	99.5283	132.078	104.685	124.246	99.1115
ARPC3	113.683	76.8327	108.671	101.53	76.4467	96.474	101.01	98.3449	131.783	105.113	114.153	109.945	123.698	145.117	124.464	101.748	127.873	149.136	172.764	117.947	132.211	167.5	140.95	93.7072	109.611	84.1652	99.9286	96.2664	105.543	91.5939	101.277	111.982	122.154	70.1155	90.3842	126.662	109.787	104.078	141.125	108.191	131.91	108.297	145.749	117.585	121.363	114.924	118.052	115.887	91.9103
UBB	422.121	297.094	410.412	485.98	532.685	444.635	408.936	484.045	322.436	374.321	354.864	531.432	458.521	500.305	402.296	425.426	460.992	676.517	528.524	553.418	403.93	567.575	403.994	414.553	593.064	473.8	415.239	746.898	530.868	422.919	315.142	459.722	385.937	384.242	335.924	455.273	406.878	523.657	438.102	568.034	416.513	626.126	506.451	505.949	430.406	612.739	490.196	521.337	487.209
TMED10	96.6903	76.1207	93.2977	106.948	75.474	93.7959	88.8178	98.1126	108.386	106.429	104.104	105.687	98.6504	200.86	117.157	121.586	106.341	165.094	119.648	108.546	86.7614	156.23	117.818	108.187	97.568	112.529	111.83	96.9461	95.5168	101.639	117.696	113.466	110.541	86.6665	114.539	118.148	91.1578	115.765	108.105	80.1374	92.6861	107.219	109.76	93.9469	91.083	112.654	107.034	98.3397	87.0424
RPL18	1146	593.88	1200.09	1051.66	949.409	743.62	975.308	1117.87	1020.97	636.38	886.588	945.503	1069.34	1131.44	1130.66	1002.09	1149.63	1100.98	1567.38	1163.28	1418.62	1263.25	1278.41	868.293	1125.48	905.625	1261.21	1286.42	933.941	785.789	1113.12	1078.41	904.837	627.206	1100.84	923.534	824.661	767.01	1008.49	880.212	642.592	882.123	998.264	828.657	1144.55	910.411	1235.33	1144.22	1133.92
DDX17	152.014	127.392	150.509	152.714	184.921	202.73	149.991	187.988	140.068	117.013	124.879	145.762	173.568	249.4	168.88	174.897	182.508	236.6	186.31	189.027	163.136	163.544	174.553	174.128	157.821	177.977	124.353	146.517	161.338	142.111	136.086	148.031	150.042	156.642	162.141	116.044	186.325	195.036	151.562	182.834	120.847	219.881	114.554	138.513	156.566	228.159	168.069	207.791	170.155
CFL1	280.962	222.552	316.859	283.248	234.982	284.341	279.766	257.362	306.538	288.873	343.193	294.378	269.254	298.524	237.319	272.554	149.165	244.608	213.912	170.855	268.106	376.268	237.179	266.709	244.084	181.921	304.021	257.09	250.71	224.055	280.792	286.182	282.627	165.394	245.83	368.807	229.424	230.085	282.276	237.483	337.584	249.933	326.611	294.923	217.484	209.324	235.196	188.907	251.041
RTN4	118.208	76.1881	144.819	129.344	139.37	115.284	157.926	155.086	114.217	84.0531	163.046	152.487	91.0404	126.068	82.1201	77.528	106.864	119.894	109.199	136.424	95.1535	109.077	87.3469	122.819	93.3799	113.518	148.062	153.337	109.682	105.067	147.167	132.775	116.635	85.8249	138.734	118.304	99.6485	104.565	88.718	106.256	96.6485	141.042	98.8071	104.97	96.6234	112.336	95.0106	92.5855	112.812
HMGB1	171.64	94.6244	134.337	135.406	126.952	102.436	99.4409	122.541	151.319	115.226	148.983	126.54	161.99	121.733	136.759	124.902	97.5912	117.102	120.136	98.614	160.035	113.366	134.152	118.896	124.705	77.2438	126.707	112.766	114.514	79.5153	116.199	109.585	129.76	72.6641	100.765	113.135	136.387	85.6351	163.395	115.706	175.617	91.769	177.667	147.487	147.661	104.245	121.585	124.851	108.657
ATP5F1	203.297	148.921	125.701	188.618	148.058	138.355	121.019	168.521	208.105	202.633	180.989	187.042	119.545	212.05	120.973	128.933	97.9809	127.098	100.218	96.8491	134.414	203.464	105.664	102.904	188.481	191.814	190.919	181.037	160.106	180.695	155.176	184.028	201.249	156.279	167.925	220.909	150.122	132.215	187.37	149.589	152.286	157.847	166.13	147.363	139.413	152.72	140.616	155.331	171.943
ERGIC3	92.897	92.5319	97.1826	88.7237	71.0886	109.89	78.562	90.9389	83.2121	92.3141	83.5657	88.8988	87.461	133.177	83.1796	67.1011	98.4213	124.596	114.223	91.1346	111.523	134.553	88.7675	67.0084	96.5551	146.457	104.02	109.015	93.0781	122.938	102.794	104.282	88.2367	103.263	99.8668	81.6821	97.2942	119.347	92.6353	89.0347	61.9842	141.772	73.2468	73.0265	104.863	141.739	113.965	101.91	102.911
HNRNPM	94.8008	73.6423	112.319	87.9847	81.3506	88.0011	81.6053	81.266	110.682	86.2061	99.7796	97.9946	161.926	154.454	131.423	137.059	90.7692	92.286	89.5769	89.1176	133.514	158.366	123.474	122.92	106.585	84.1225	93.5926	101.115	96.7668	78.0976	86.1533	96.8758	109.223	70.8953	93.8107	115.528	108.802	75.0282	120.092	107.075	125.218	78.8742	128.212	114.145	97.0557	91.9196	85.6683	90.5722	97.347
ATP5E	120.97	118.791	97.4049	120.485	85.4068	99.2338	92.4166	138.604	132.415	134.166	137.205	138.933	94.5468	137.012	105.992	122.352	63.7599	83.2927	98.305	75.879	115.771	145.148	97.3512	85.7425	93.7658	110.926	98.4935	129.401	85.685	113.499	110.527	136.782	108.071	99.2656	101.693	144.426	90.6971	85.5981	143.789	110.81	85.0103	72.7032	116.917	97.1729	93.7096	87.1369	110.774	117.101	94.5332
RPL13A	1134.6	998.234	1063.67	1046.92	897.793	605.635	897.884	1080.08	1048.88	895.108	973.647	1012.07	1011.08	682.179	1013.52	883.473	1009.64	815.065	1089.22	1258.98	1076.95	784.83	1140.88	809.617	1098.26	631.56	1135.69	1301.74	907.612	558.626	895.418	944.493	877.466	459.546	986.851	928.808	842.212	590.219	1043.14	931.382	693.168	715.071	873.434	870.692	1101.23	678.861	1106.9	1151.85	1007.76
EIF3F	122.112	55.6363	120.894	112.413	111.782	70.6197	94.9595	108.843	104.956	54.1299	101.773	100.529	103.006	82.3022	98.4279	95.091	126.152	111.774	144.049	120.76	125.37	91.2569	100.92	82.2352	115.6	79.6422	126.251	152.058	123.791	80.0584	112.017	118.356	103.551	71.9917	114.394	105.548	96.3811	85.0818	94.0784	93.5854	74.2874	107.198	81.9546	84.1684	124.984	95.6272	109.972	110.178	131.668
HNRNPA2B1	258.586	150.489	210.533	199.2	218.462	185.482	153.483	173.49	261.556	181.366	204.539	191.523	353.786	268.073	241.119	259.856	211.892	198.346	188.725	189.521	243.506	225.804	213.048	216.343	240.562	154.767	183.857	164.208	223.917	136.27	178.078	179.968	252.506	137.265	165.152	213.521	242.739	167.042	224.136	190.402	284.872	163.808	217.297	211.399	202.53	185.015	124.5	180.654	171.822
LOC102274318	94.6114	116.157	123.942	114.77	82.3388	148.887	91.2295	134.647	84.9709	133.395	107.395	117.289	87.7989	182.485	122.595	111.44	65.0684	134.043	125.02	107.167	96.6892	154.47	139.737	118.951	94.0742	125.504	116.842	129.615	95.5015	112.602	114.573	122.012	85.6326	95.9773	121.134	117.702	75.8402	127.579	132.404	125.024	76.0797	137.697	135.084	128.202	85.5816	134.407	132.155	129.055	112.568
KARS	199.386	90.6239	184.115	160.574	153.984	111.923	140.77	167.317	166.813	113.969	157.674	169.089	129.141	160.781	128.132	118.425	169.866	171.937	225.387	168.084	165.368	162.281	154.721	108.427	197.61	141.482	195.88	214.413	186.17	112.58	167.711	184.782	197.663	104.642	182.309	159.232	171.516	141.064	175.36	148.58	120.731	144.237	146.205	127.835	203.527	139.585	199.513	187.689	239.903
PRKAR1A	127.286	69.7698	157.32	126.787	133.599	103.619	123.371	132.364	137.897	79.9628	143.694	147.532	179.516	134.141	163.48	159.851	208.903	137.997	200.929	198.52	166.49	139.394	145.537	166.741	146.567	101.694	147.561	155.443	129.989	90.4629	118.138	142.857	134.927	80.3917	124.476	144.071	147.613	102.796	143.876	149.92	126.794	115.734	141.019	142.797	147.456	111.588	143.169	170.876	120.339
ACTB	1711.99	994.646	1356.71	1927.39	1312.83	1558.45	1630.33	1372.98	1149.4	1053.95	1689.25	1505	1381.24	1203.68	904.603	1470.96	945.046	1511.16	947.681	1143.77	1185.05	1710.11	825.709	1865.96	1266.41	723.463	1341.32	1633.94	1354.87	1296.58	1119.29	1262.44	852.86	1553.31	1165.55	1302.01	1008.12	1064.3	1035	1352.79	1399.73	1296.56	1323.69	1300.27	1050.6	1383.84	984.12	1027.17	1359.35
CTTN	118.296	54.4199	104.312	113.652	88.5319	70.023	97.5256	95.936	128.045	58.8439	106.997	109.087	110.361	93.7777	122.134	113.646	111.257	91.7441	120.125	104.736	115.098	108.16	129.277	103.169	122.569	63.3227	108.626	106.176	106.874	50.9533	109.067	109.539	124.901	47.1256	107.498	127.133	115.307	73.9618	129.961	108.892	106.896	71.8217	121.957	104.415	104.557	73.1686	106.832	107.499	98.7712
LOC102266785	133.6	89.8614	122.412	108.649	126.438	108.456	133.985	141.491	130.072	101.072	127.012	109.471	99.0989	171.828	97.8217	77.0669	118.986	164.502	172.1	120.615	136.539	166.799	112.108	87.0005	122.879	105.427	140.555	129.339	125.785	107.244	115.996	116.052	112.108	92.2795	96.1471	91.7089	100.616	104.581	99.8678	83.7449	96.8992	130.843	105.24	95.6939	106.42	122.363	97.784	92.2781	111.848
EIF3H	195.367	89.0691	172.862	143.85	172.419	112.216	154.467	157.856	166.627	94.5088	138.693	146.061	148.826	137.311	137.27	128.085	204.538	172.142	221.452	204.178	191.615	133.929	147.862	106.712	186.242	116.885	157.247	183.1	176.706	118.001	139.858	148.035	153.744	94.7772	139.817	112.736	142.429	121.084	138.951	118.596	112.767	149.453	132.286	121.057	186.079	138.907	155.339	165.867	191.125
GAPDH	593.036	521.488	747.417	726.656	649.689	696.657	864.333	710.048	574.695	594.434	1008.97	794.316	639.914	532.523	636.396	670.08	977.39	983.778	998.362	736.147	588.412	791.684	596.382	751.821	649.875	621.615	756.049	1007.07	548.614	666.254	1128.75	816.228	595.133	679.677	885.095	963.862	686.851	715.541	720.996	711.54	951.241	652.412	943.046	994.145	640.872	721.796	514.535	725.86	617.499
RPS9	766.237	603.292	764.567	644.586	475.019	621.967	527.697	590.351	704.742	657.697	660.838	691.64	844.194	644.595	843.494	668.744	936.146	647.992	1005.65	916.241	1147.31	780.619	1055.68	657.815	776.839	404.498	787.981	750.309	673.043	680.67	715.995	718.725	688.818	621.144	774.908	725.827	680.048	634.226	867.668	718.417	534.677	489.971	779.782	652.552	898.905	528.567	896.389	865.506	699.506
PRDX2	205.826	234.513	178.752	223.059	234.535	240.275	198.794	284.947	232.039	281.494	208.524	233.402	126.094	304.099	172.377	165.601	110.45	180.061	179.201	139.651	199.395	301.576	203.912	175.195	166.726	337.91	218.591	243.062	183.689	272.232	199.847	227.6	193.17	204.038	205.371	245.794	187.445	185.555	282.806	245.187	203.877	208.114	245.255	239.64	189.321	174.508	261.099	209.9	223.437
EIF3M	146.43	85.2739	118.902	116.256	131.044	103.232	94.2175	119.439	143.681	83.9943	109.606	120.927	117.295	128.023	103.049	96.5513	183.169	168.245	181.084	160.549	115.711	117.962	112.195	77.6388	126.715	103.723	119.476	148.874	135.602	115.503	100.671	104.863	149.55	113.297	125.091	105.877	123.53	117.08	127.013	105.209	97.0687	146.975	109.228	101.148	199.012	136.68	142.705	148.659	152.528
SHFM1	153.712	87.7743	116.048	129.934	149.845	114.141	131.674	149.723	185.824	104.974	146.693	159.517	227.095	186.559	175.9	168.304	154.846	142.832	156.198	128.336	181.279	161.476	143.478	127.676	174.06	87.646	125.502	168.827	148.423	89.9268	104.216	132.905	183.638	78.2033	125.99	159.732	148.674	111.632	176.151	136.239	169.753	111.395	173.879	140.167	159.459	128.807	133.714	138.967	153.024
[truncated: 14 more columns]
