# Supplementary material for: Transcriptome-Based Evaluation of Optimal Reference Genes for Quantitative Real-Time PCR in Yak Stomach throughout the Growth Cycle
Source: Animals (Basel). 2023 Mar 3;13(5):925. doi: 10.3390/ani13050925 (PMC10000025; doi:10.3390/ani13050925)
Supplement: Supplementary file 1 [file animals-13-00925-s001.zip › Table S3.xlsx]

## Sheet: Sheet1
Description	Scientific Name	Max Score	Total Score	Query Cover	E value	Per.Ident	Acc.Len	Accession
PREDICTED: Bos mutus glyceraldehyde-3-phosphate dehydrogenase (GAPDH), mRNA	Bos mutus	195	195	0.91	2e-45	1	1194	XM_014482068.1
PREDICTED: Bos mutus actin, beta (ACTB), mRNA	Bos mutus	119	119	0.92	5e-23	0.9718	1889	XM_005887322.2
PREDICTED: Bos mutus ubiquitously-expressed, prefoldin-like chaperone (UXT), mRNA	Bos mutus	141	141	0.84	2e-29	0.9756	887	XM_005899362.2
PREDICTED: Bos mutus protein phosphatase 1, regulatory (inhibitor) subunit 11 (PPP1R11), transcript variant X2, mRNA	Bos mutus	202	202	0.96	1e-47	0.9828	1892	XM_014483599.1
PREDICTED: Bos mutus dysbindin (dystrobrevin binding protein 1) domain containing 2 (DBNDD2), transcript variant X1, mRNA	Bos mutus	159	159	0.92	5e-35	0.9785	1472	XM_014477527.1
PREDICTED: Bos mutus ribosomal protein S9 (RPS9), mRNA	Bos mutus	150	150	0.88	2e-32	1	923	XM_014483477.1
PREDICTED: Bos mutus ribosomal protein S15 (RPS15), mRNA	Bos mutus	124	124	0.81	1e-24	1	467	XM_005890466.2
PREDICTED: Bos mutus mitochondrial ribosomal protein L39 (MRPL39), mRNA	Bos mutus	178	178	0.93	1e-40	0.9806	1162	XM_005898618.2
PREDICTED: Bos mutus mitochondrial ribosomal protein S15 (MRPS15), transcript variant X1, mRNA	Bos mutus	143	143	0.88	4e-30	0.9762	866	XM_014477429.1
PREDICTED: Bos mutus ribosomal protein L13a (RPL13A), transcript variant X1, mRNA	Bos mutus	167	167	0.84	3e-37	1	1164	XM_005904989.2
PREDICTED: Bos mutus TATA box binding protein (TBP), transcript variant X2, mRNA	Bos mutus	459	459	0.97	1e-124	0.9884	1551	XM_005908678.2
PREDICTED: Bos mutus DEAD (Asp-Glu-Ala-Asp) box polypeptide 54 (DDX54), transcript variant X1, mRNA	Bos mutus	187	187	0.95	3e-43	0.9815	3025	XM_005904734.2
PREDICTED: Bos mutus tyrosine 3-monooxygenase/tryptophan 5-monooxygenase activation protein, zeta (YWHAZ), mRNA	Bos mutus	113	113	0.82	2e-21	0.9846	918	XM_005887010.2
PREDICTED: Bos mutus hydroxymethylbilane synthase (HMBS), transcript variant X1, mRNA	Bos mutus	193	193	0.85	6e-45	0.9907	1486	XM_005897125.2
PREDICTED: Bos mutus ribosomal protein S23 (RPS23), mRNA	Bos mutus	156	156	0.96	5e-34	0.9886	517	XM_005903762.2
