# Supplementary figures and images for: Transcriptome-Based Evaluation of Optimal Reference Genes for Quantitative Real-Time PCR in Yak Stomach throughout the Growth Cycle
Source: MDPI journal article supplement (doi:10.3390/ani13050925), 2023-03-03

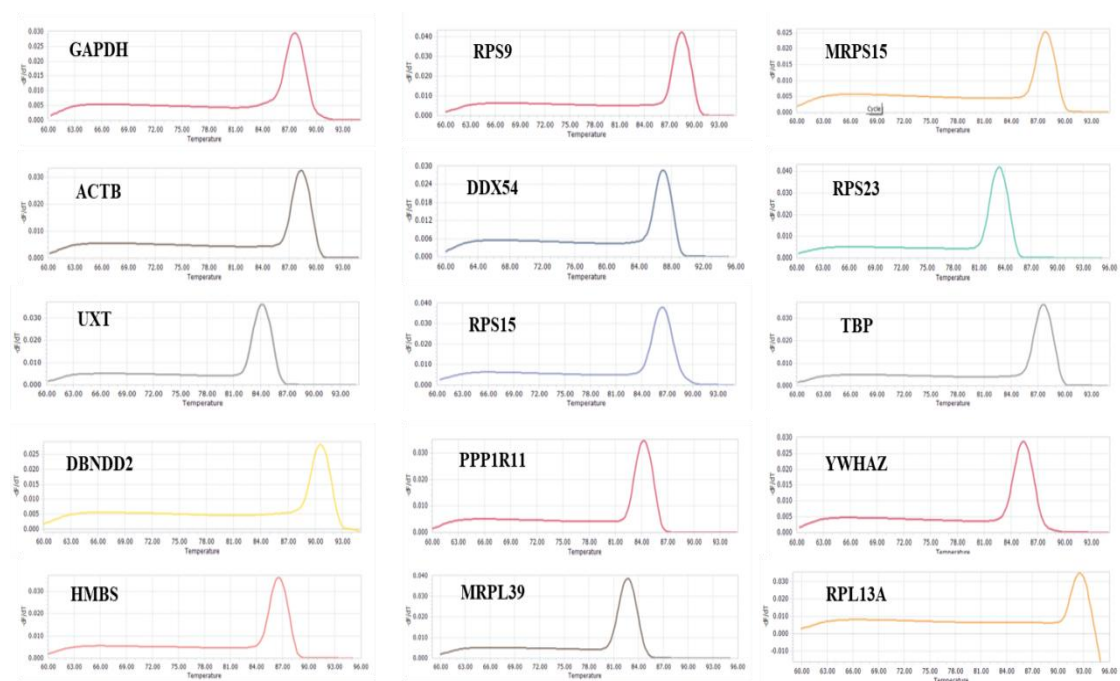

**Figure S3.** Melting curves of 15 candidate reference genes

Supplement: s1 [file s1]

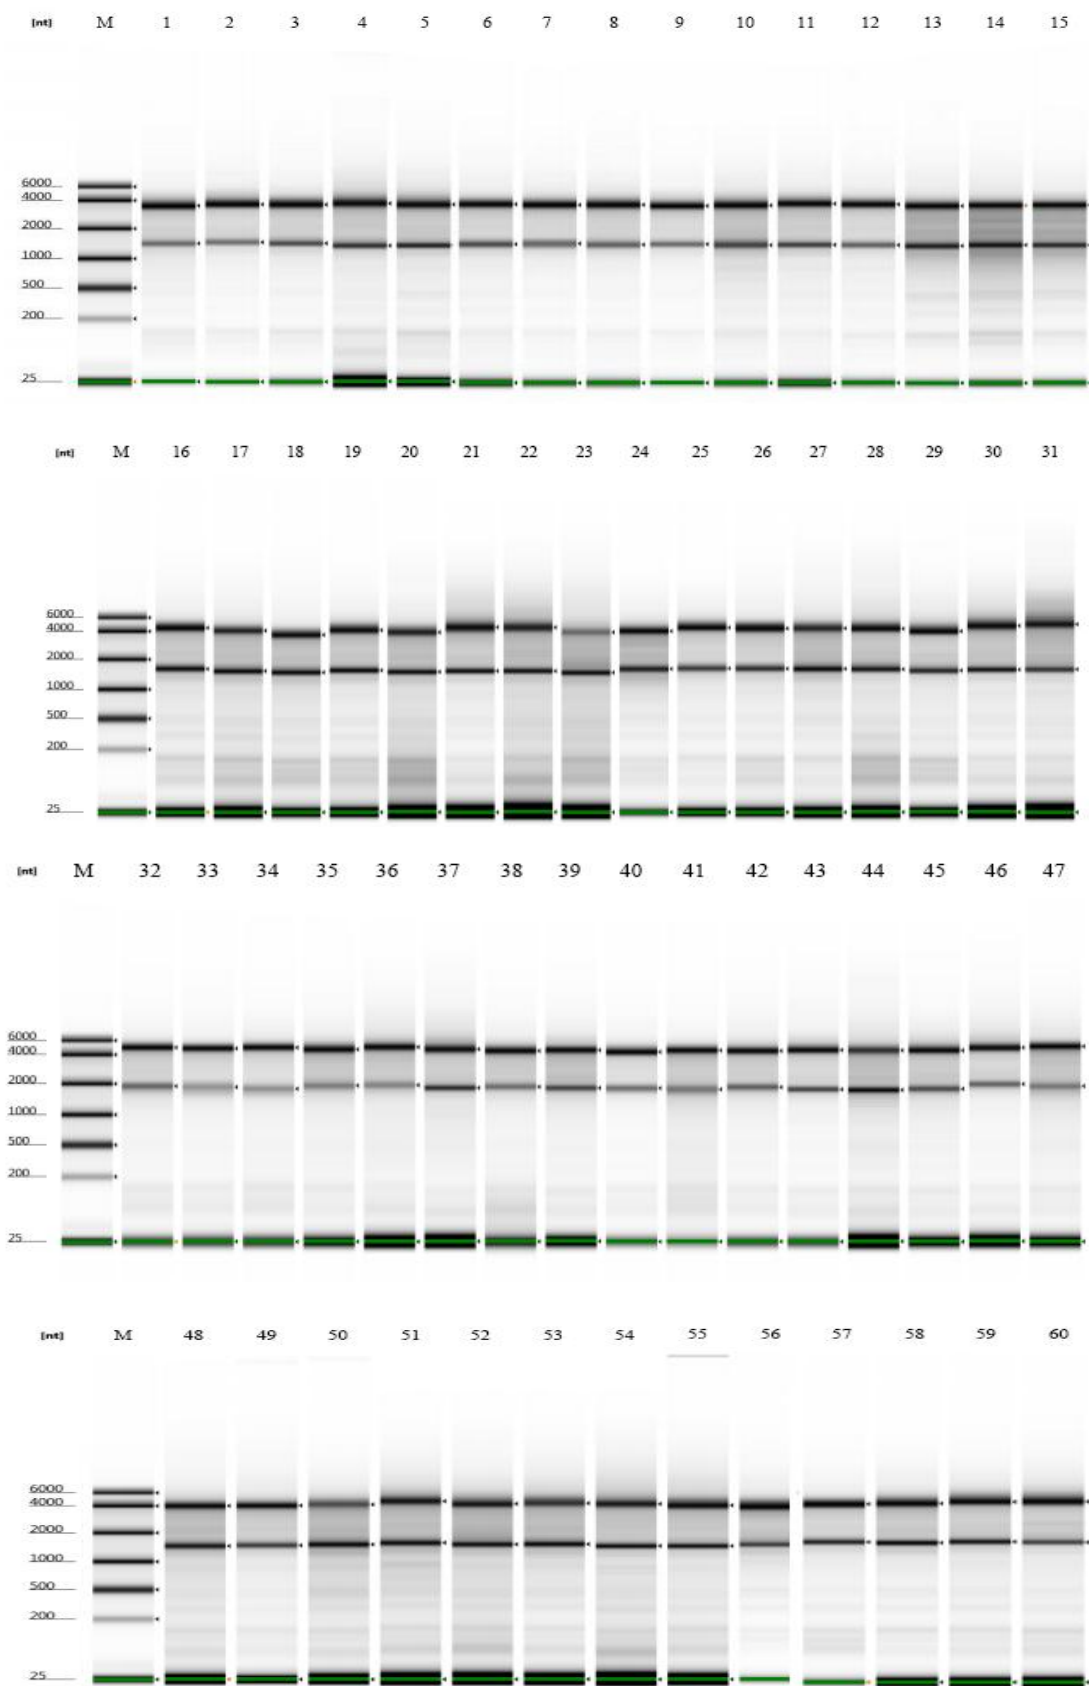

**Figure S1.** Agarose gel electrophoresis for all tested RNA samples

Supplement: s1 [file s1]

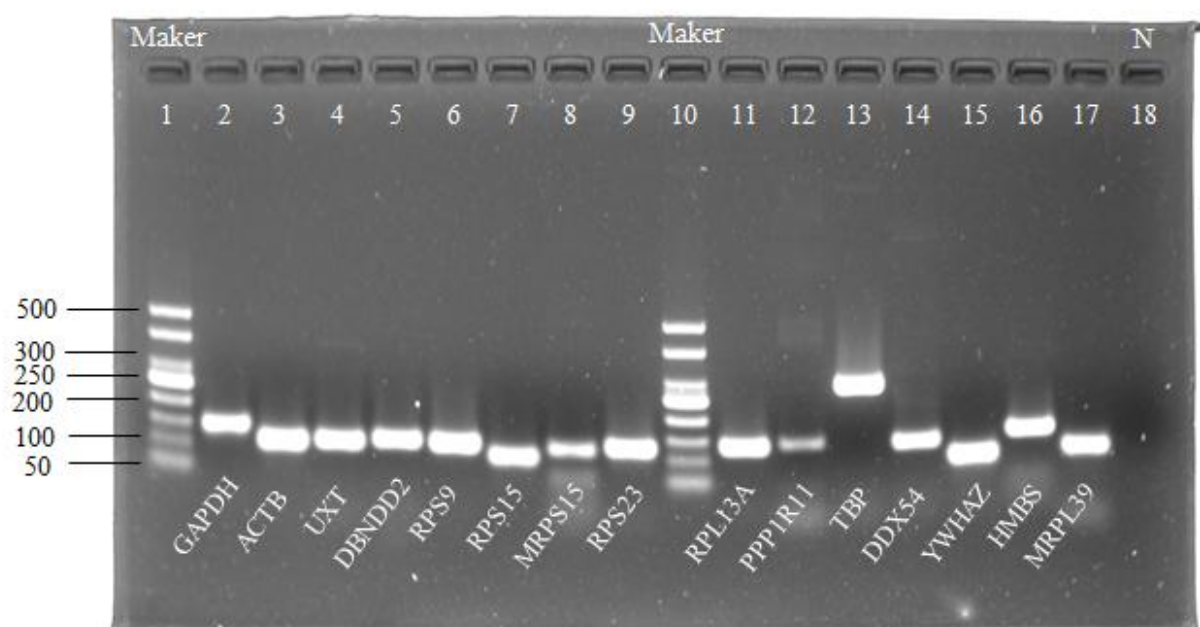

**Figure S2.** Agarose gel electrophoresis for 15 candidate reference genes

Supplement: s1 [file s1]
